# Supplementary material for: Structure-Function Correlation Analysis of Connexin50 Missense Mutations Causing Congenital Cataract: Electrostatic Potential Alteration Could Determine Intracellular Trafficking Fate of Mutants
Source: Hindawi journal article supplement (doi:10.1155/2014/673895), 2014-01-01
Supplement: f1 [file 673895.f1.pdf]

SUPPLEMENTARY FIGURES:

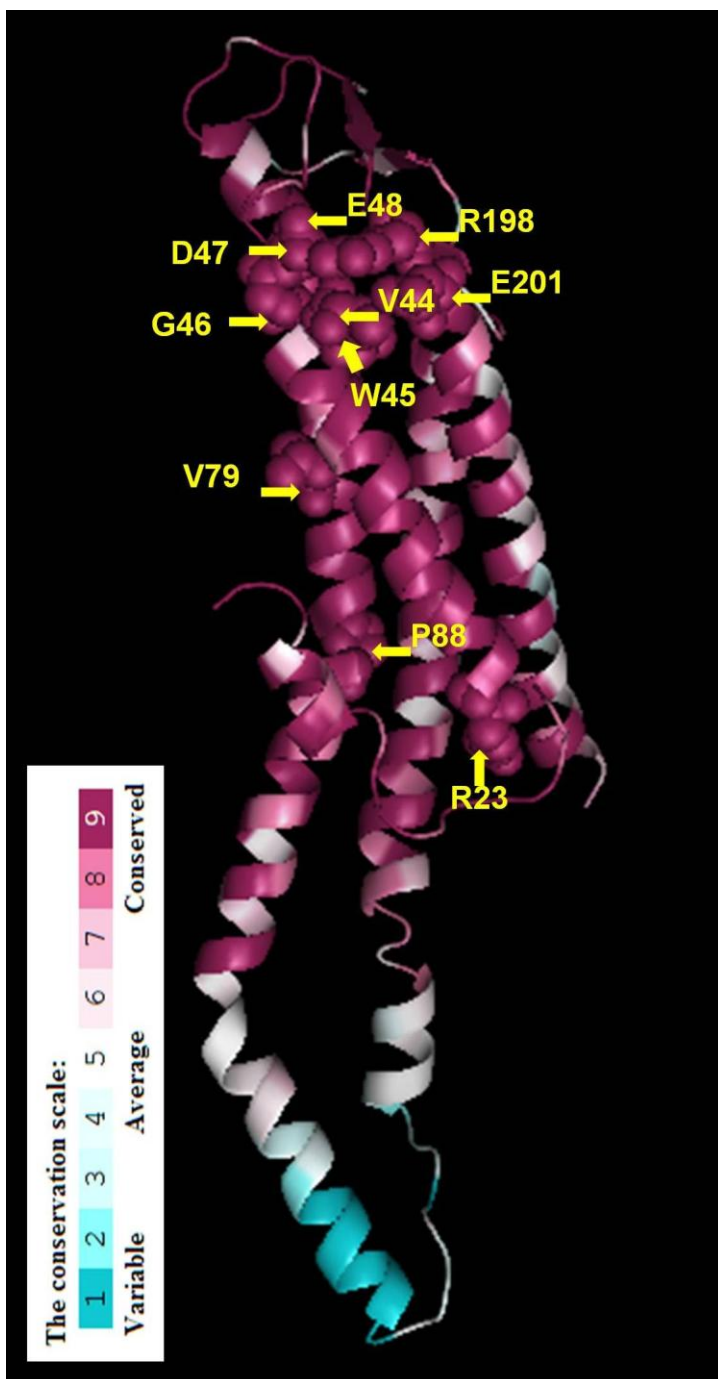

Supplemental Figure 1.

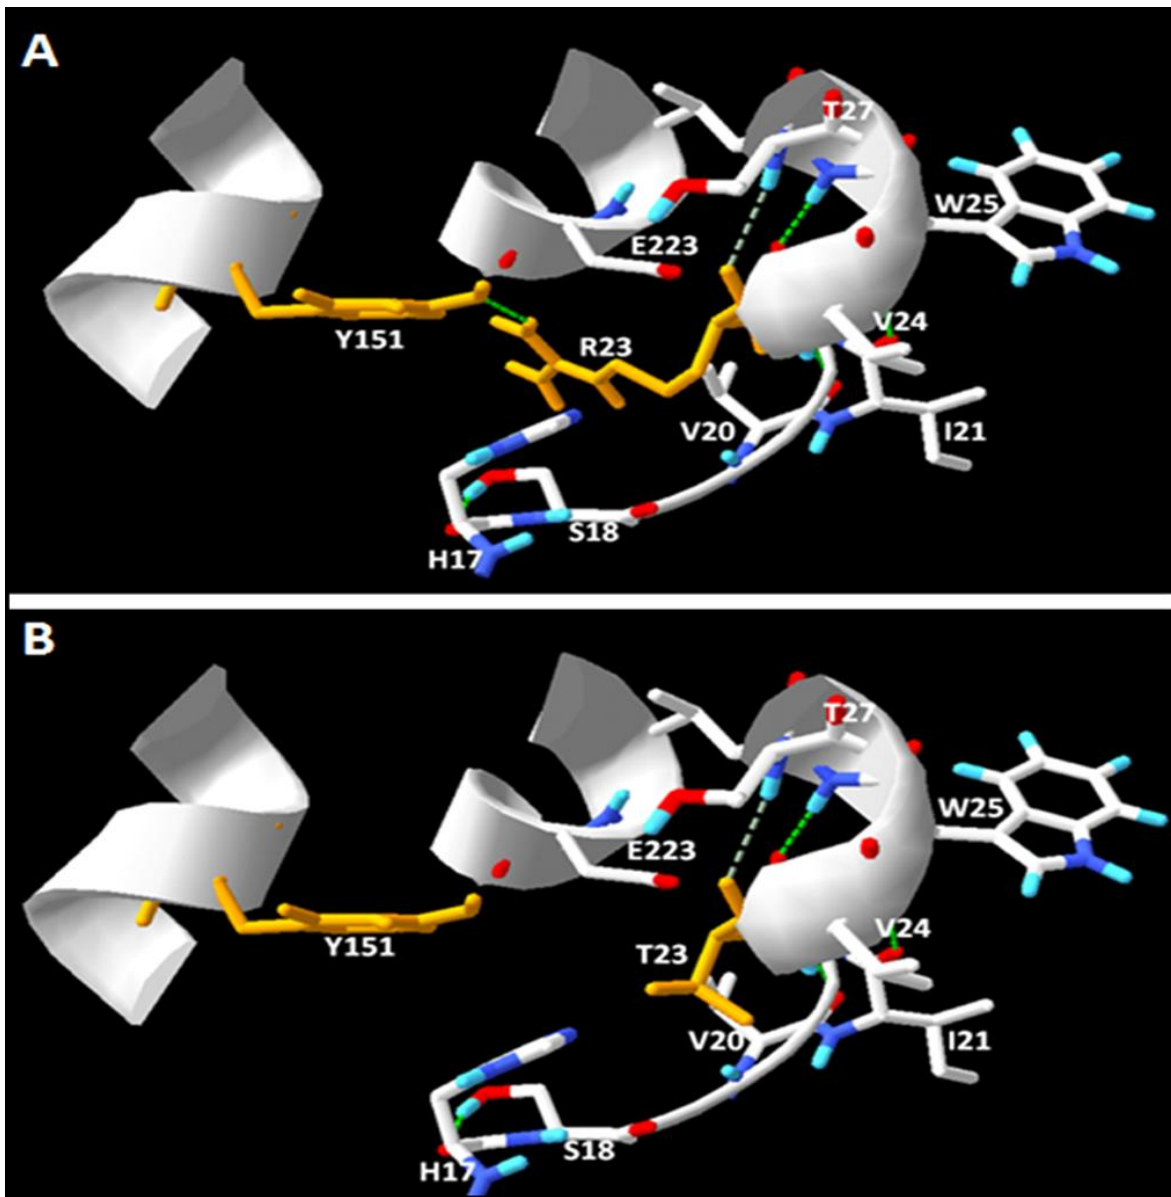

Supplemental Figure 2.

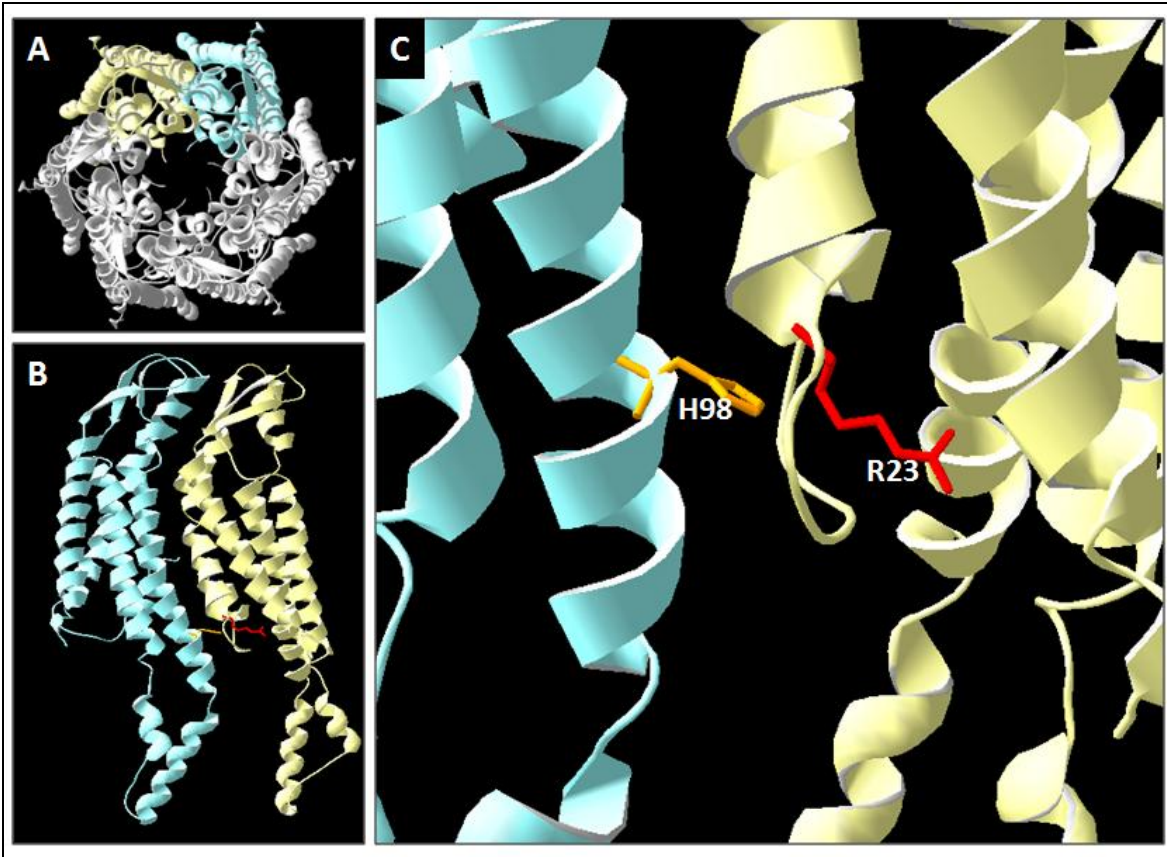

Supplemental Figure 3.

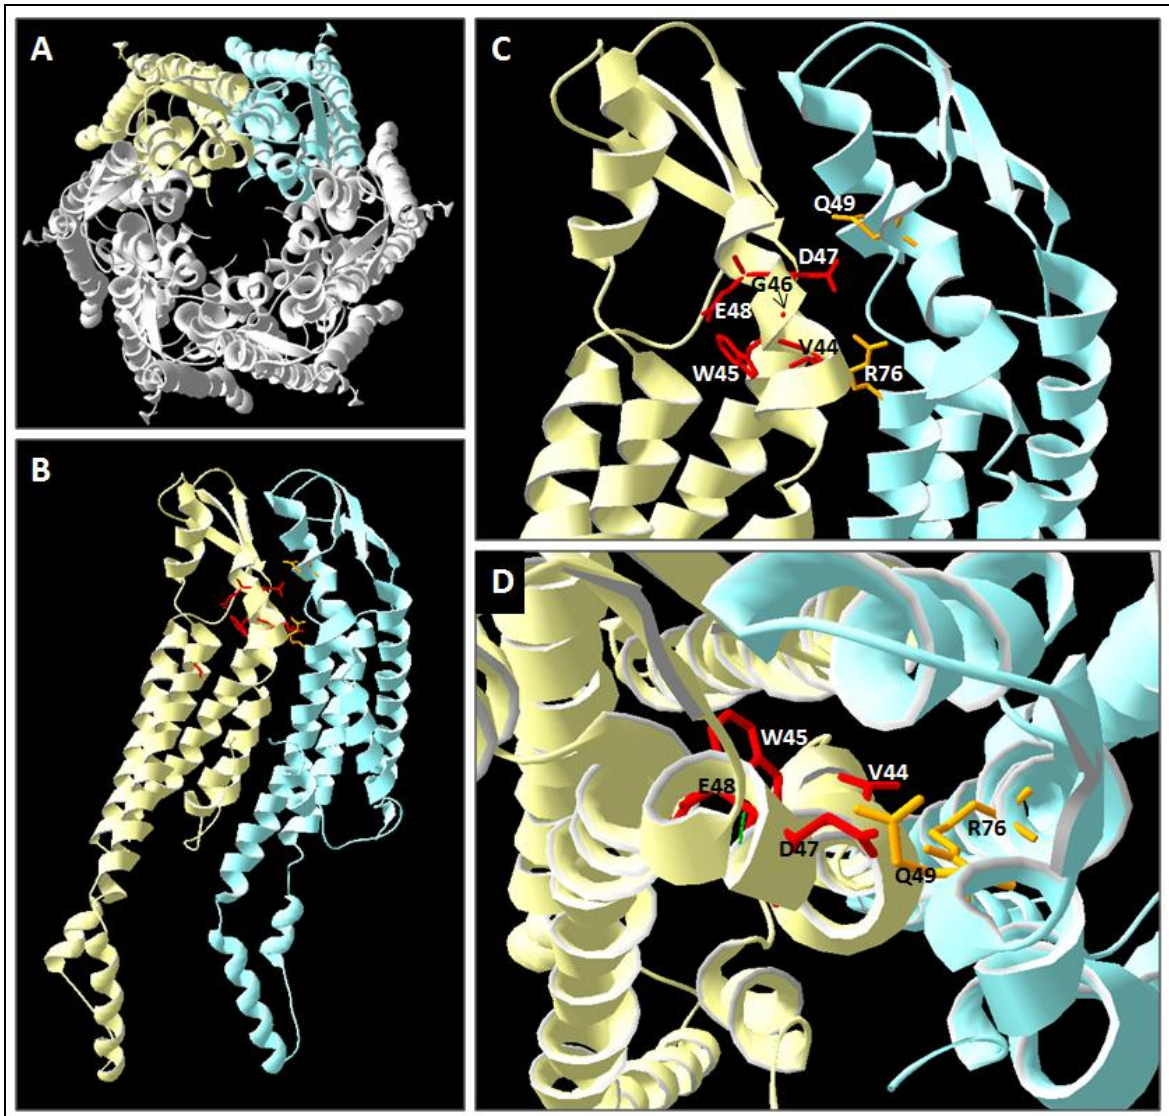

Supplemental Figure 4.

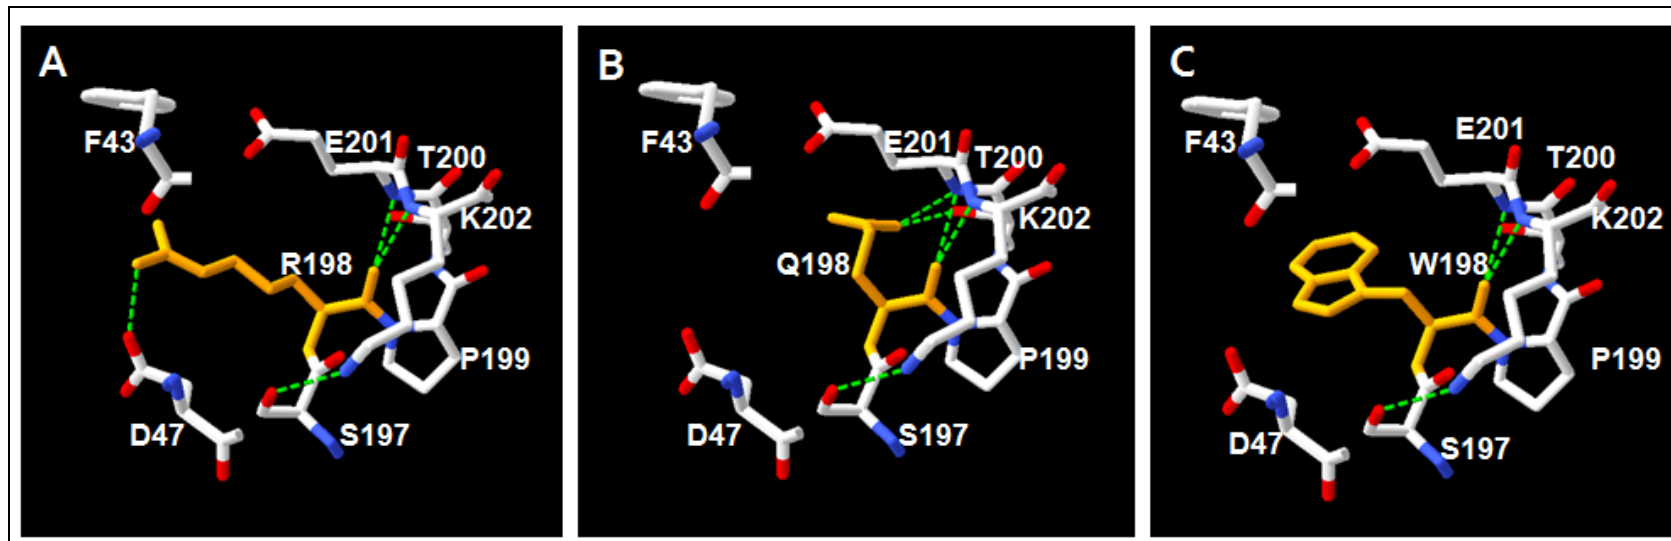

Supplemental Figure 5.

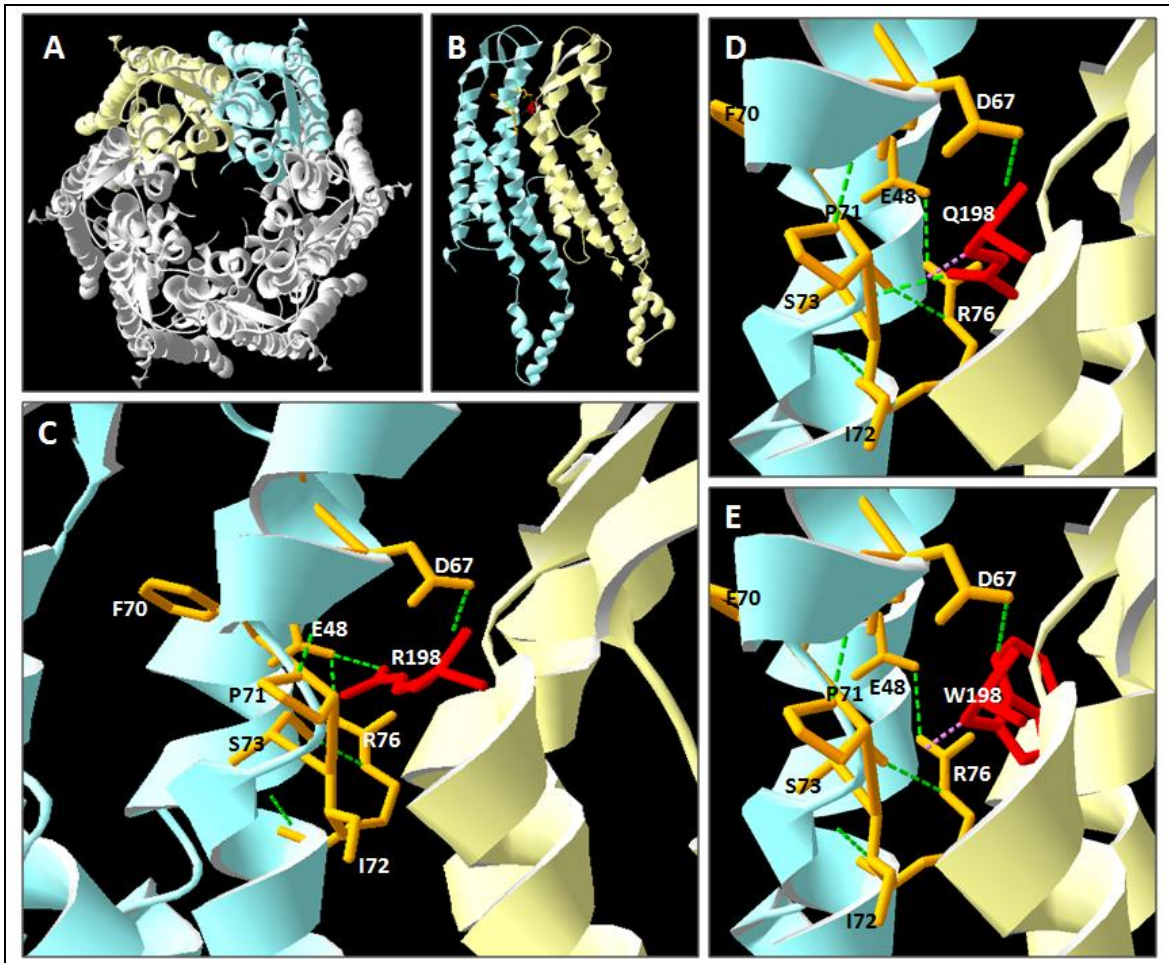

Supplemental Figure 6.

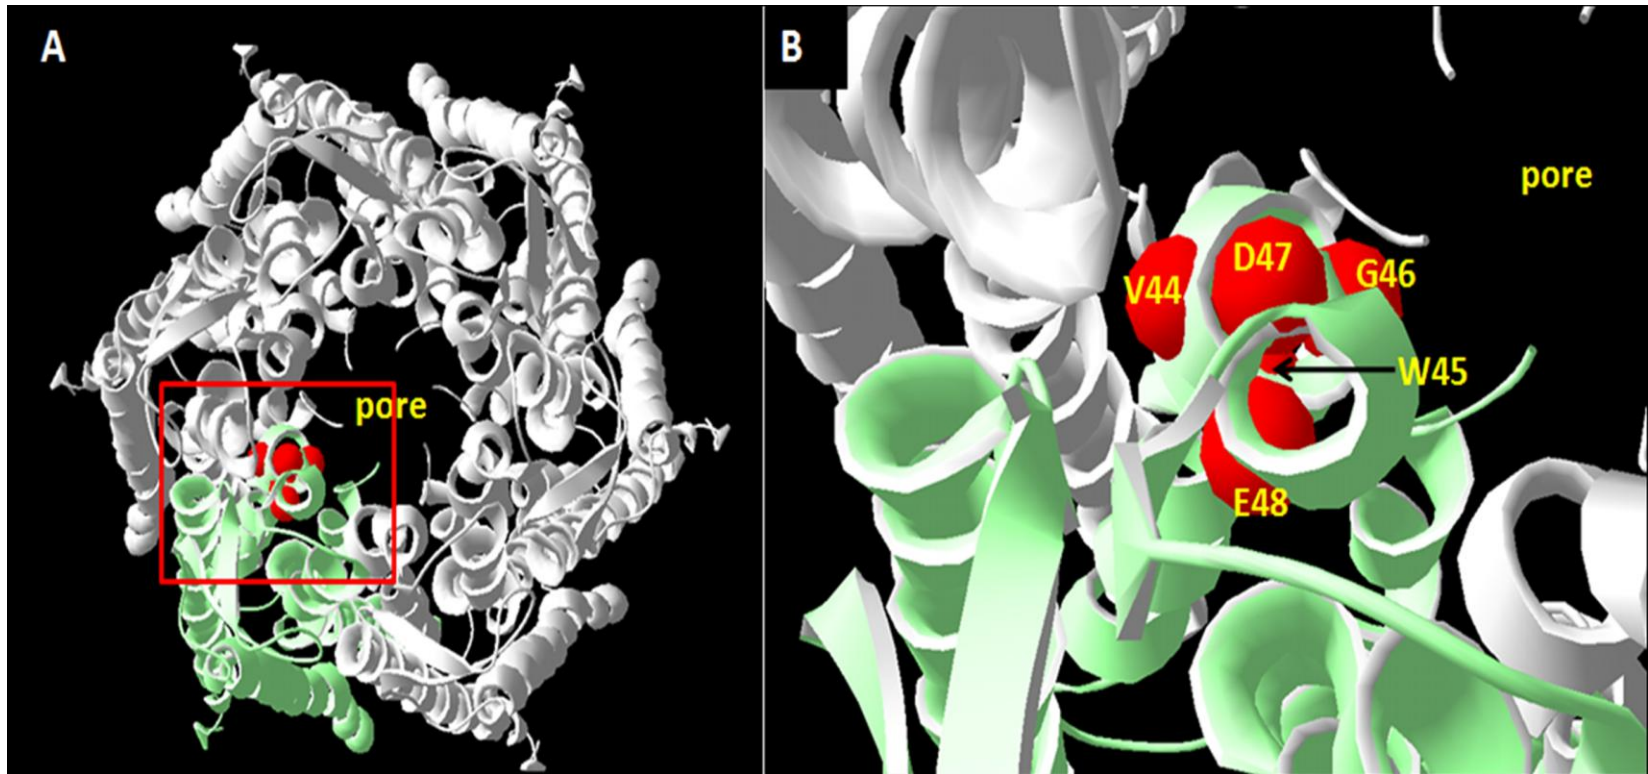

Supplemental Figure 7.

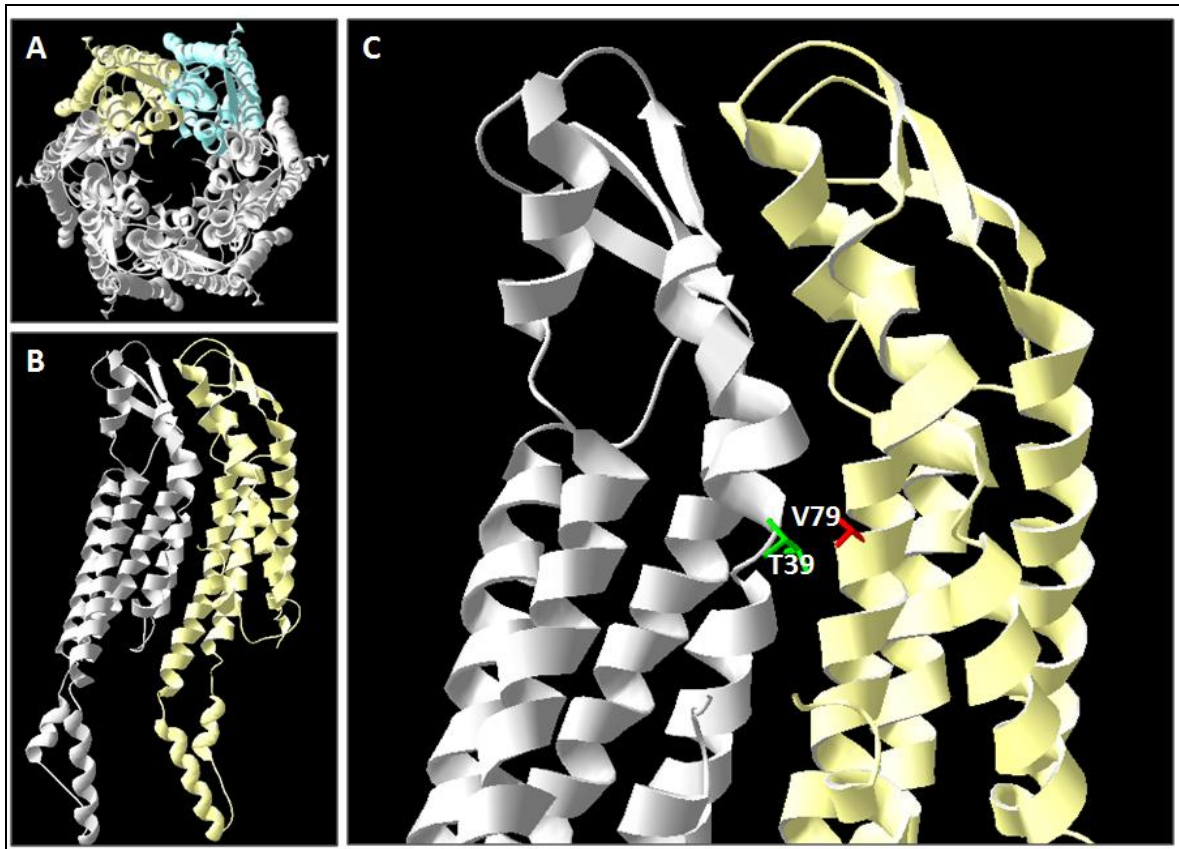

Supplemental Figure 8.



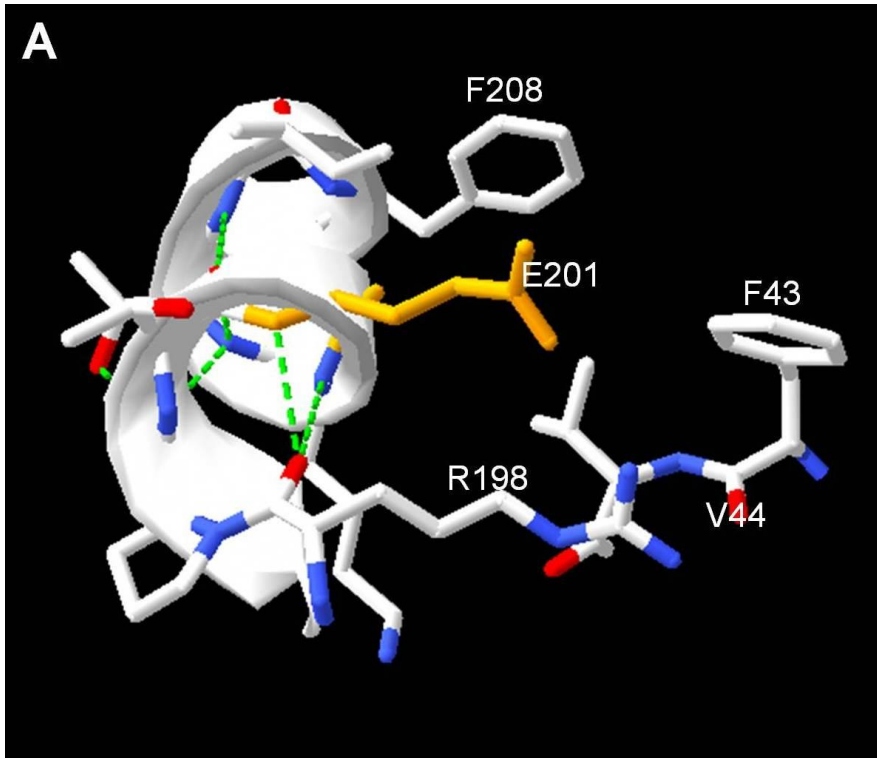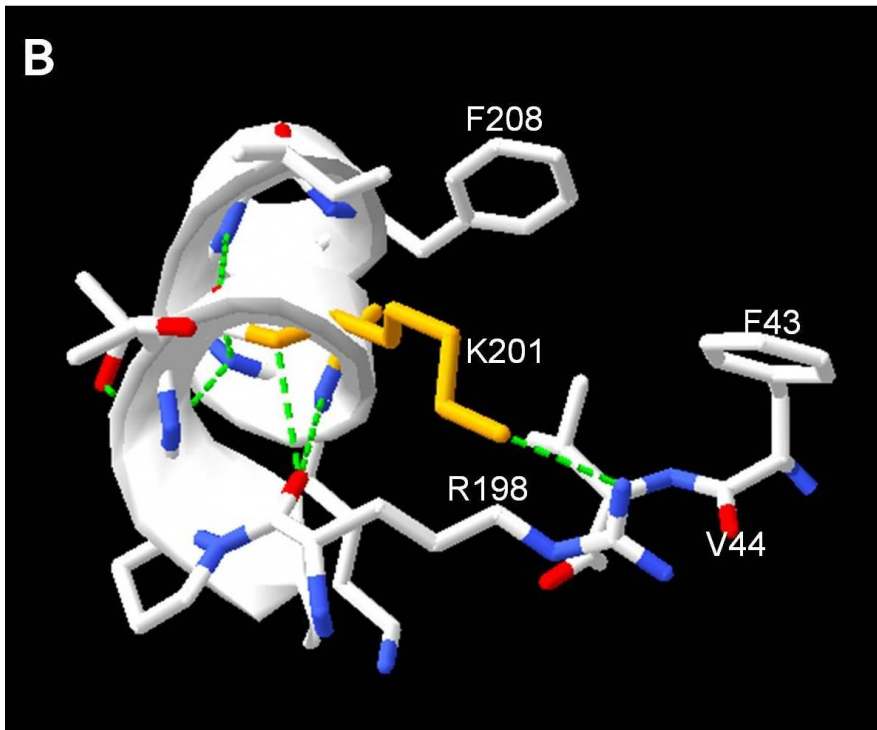

Supplemental Figure 9.

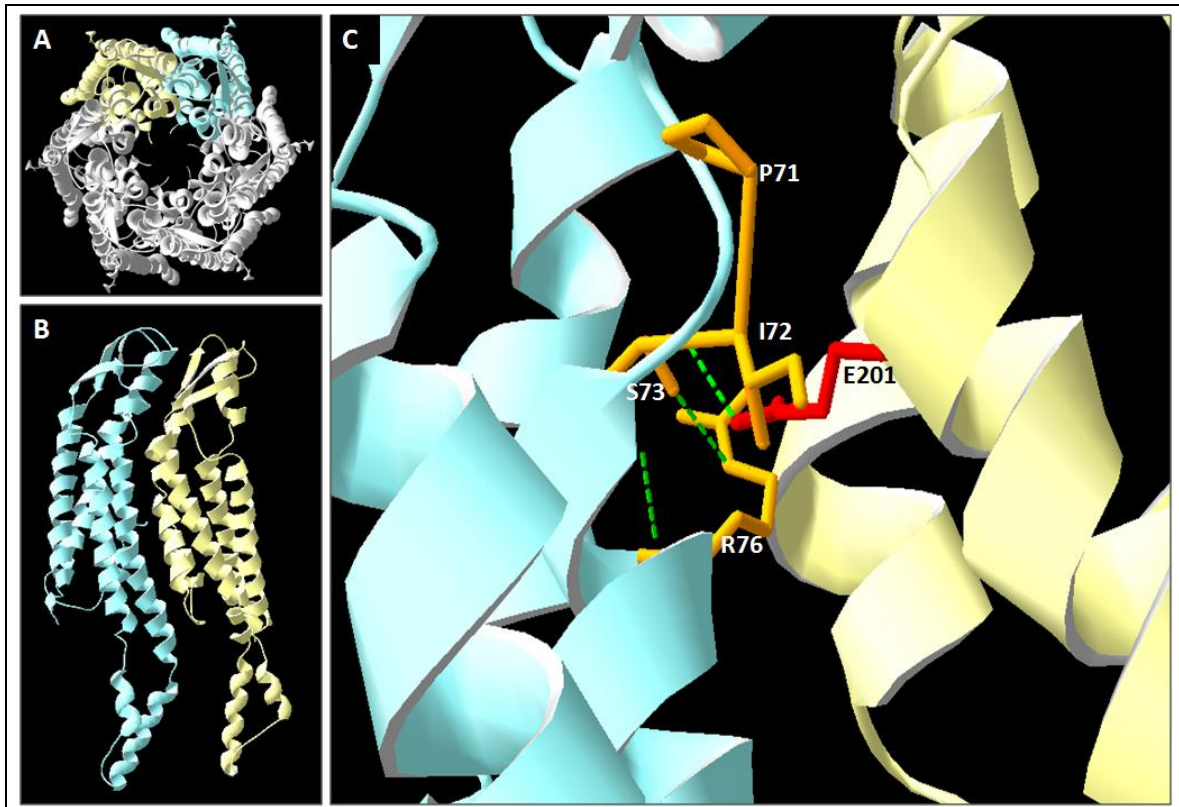

Supplemental Figure 10.

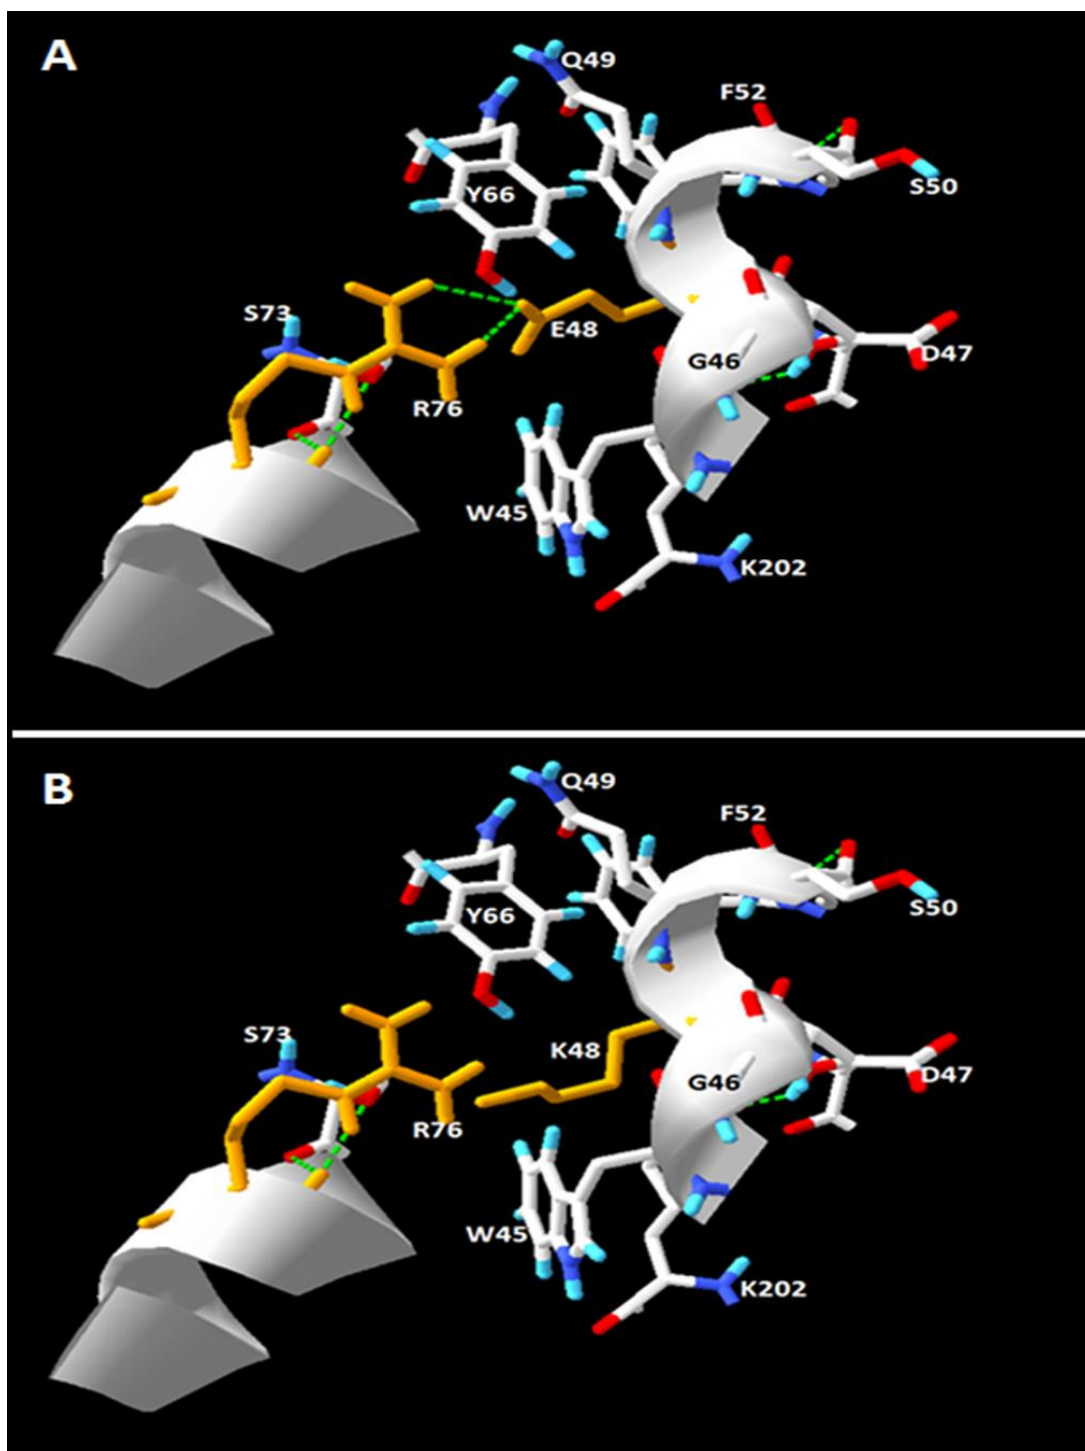

Supplemental Figure 11.

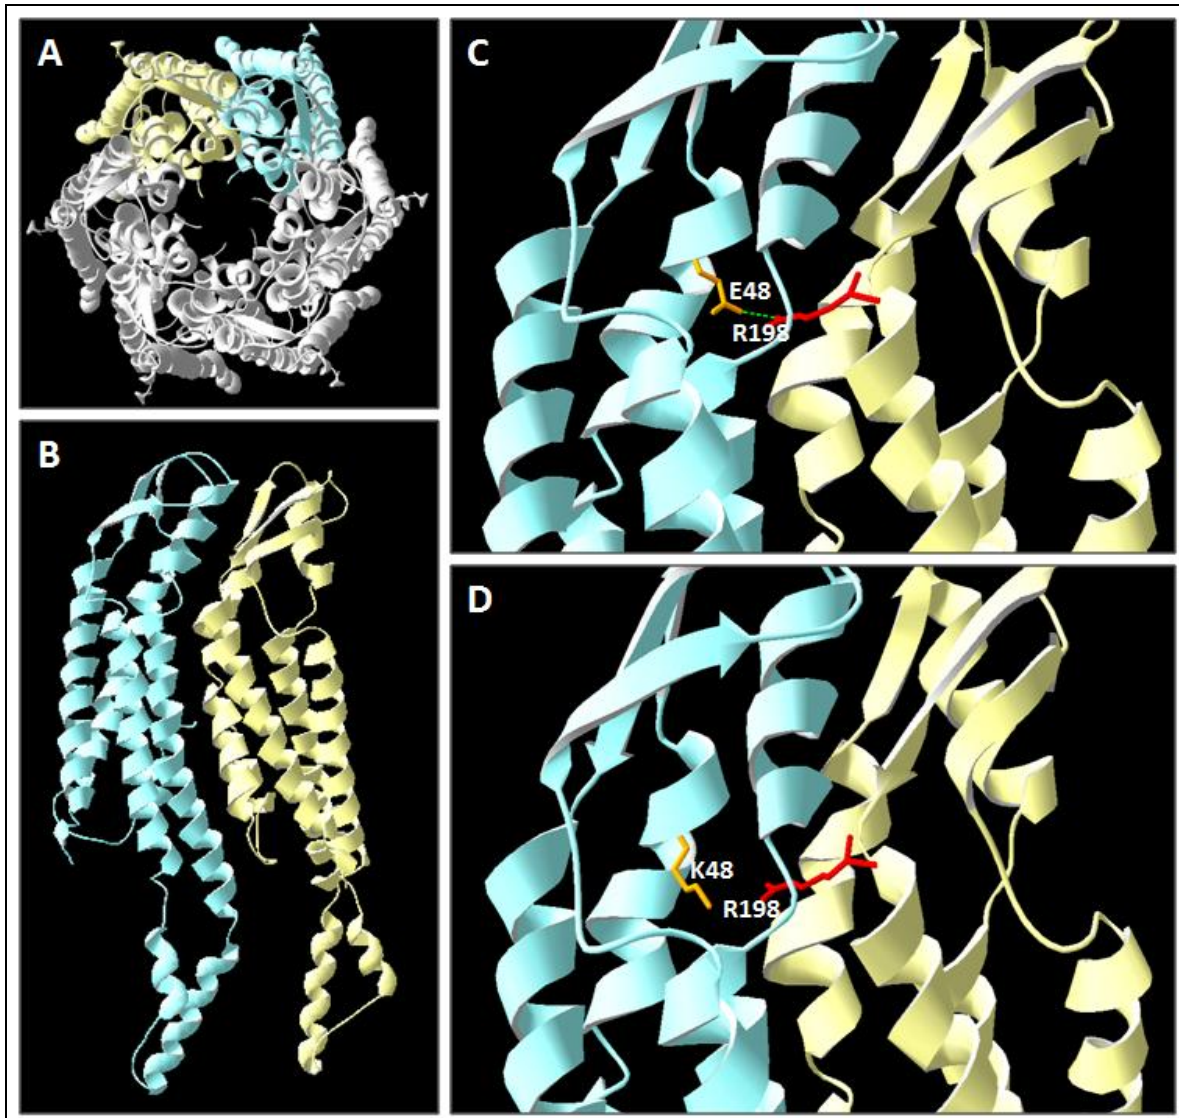

Supplemental Figure 12.

## **SUPPLEMENTARY FIGURE LEGENDS:**

### **Supplemental Figure 1. The homology model of Cx50 color-coded according to evolutionary conservation.**

Ribbon view of the Cx50 homology model is shown with the mutation-involving residues plotted on it. The structure is color-coded according to evolutionary conservation using the ConSurf server, with turquoise-through-maroon corresponding to variable-through-conserved positions (see color bar). PyMOL was used for visualization. All of the functionally characterized Cx50 mutations involve highly conserved residues. *Check supplementary text for multiple sequence alignment.*

### **Supplemental Figure 2. The 3-dimensional neighborhood (surrounding 4Å space) of R23 in normal Cx50 protein (homology model).**

A. Residues lying within surrounding 4Å space of R23 are shown. R23 (TM1) has inter-helix H-bonding with side-chain of Y151 (TM3). B. The H-bond of R23 with Y151 is lost in the mutant R23T. Green and grey dotted lines indicate potential H-bonds (strong and weak, respectively) - computed using the SwissPDBViewer.

### **Supplemental Figure 3. The 3-dimensional neighborhood of R23 in the oligomeric complex.**

A. Docked model of hemichannel – viewed from the top. Two adjacent Cx50 subunits are colored. B. Two adjacent Cx50 subunits are shown to be arranged in similar relation as in the hexameric complex – viewed from outer lipid-facing side. C. Mutation-involving residue R23 (red) in one subunit (yellow) and H98 (orange) of adjacent subunit (blue) lie within 4Å space.

**Supplemental Figure 4. The 3-dimensional neighborhood of V44, W45, G46, D47 and E48 in the oligomeric complex.**

A. Docked model of hemichannel – viewed from the top. Two adjacent Cx50 subunits are colored. B. Two adjacent Cx50 subunits are shown to be arranged in similar relation as in the hexameric complex – viewed from pore side. C. Mutation-involving residues 44-48 are shown (red) in one subunit (yellow); two residues (R76 & Q49 - orange) in adjacent subunit (blue) within surrounding 4Å space of the mutation-involving residues are shown. D. The intermolecular interface (involving residues 44-48 of one chain and R76 & Q49 of adjacent chain) is shown – viewed from the top. Side-chains of V44 & D47 point outwards, facing adjacent subunit; side-chains of W45 & E48 are directed towards the subunit. There is no inter-subunit H-bonding involving the residues.

**Supplemental Figure 5. The 3-dimensional neighborhood (surrounding 4Å space) of R198 in normal Cx50 protein (homology model).**

A. Residues lying within surrounding 4Å space of R198 are shown. B. R198Q leads to loss of 1 H-bond with D47 and gain of another H-bond with T200/E201. C. R198W leads to a loss of 1 H-bond with D47. Green lines indicate potential H-bonds - computed using the SwissPDBViewer.

**Supplemental Figure 6. The 3-dimensional neighborhood of R198 in the oligomeric complex.**

A. Docked model of hemichannel – viewed from the top. Two adjacent Cx50 subunits are colored. B. Two adjacent Cx50 subunits are shown to be arranged in similar relation as in the hexameric complex – viewed from outer lipid-facing side. C. Neighbouring residues in adjacent subunit (orange) that lie within surrounding 4Å space of R198 (red) are shown. R198 might form H-bond with E48 of adjacent subunit. Green dotted lines indicate potential H-bond - computed using the SwissPDBViewer. D. R198Q – the H-bond with E48 is

replaced with a new H-bond with S73; steric clash induced (pink dotted line). E. R198W – the H-bond with E48 is lost; steric clash induced.

**Supplemental Figure 7. The 3-dimensional neighborhood of G46 in the oligomeric complex.**

A. Docked model of hemichannel (constructed by SymmDock server) formed by symmetric docking of Cx50 subunits (Cx50 homology models). A single Cx50 subunit is colored light-green. Mutation-involving residues (red spheres) in the junction of TM1 and EC1 are localized in the docked model. B. Zoomed view of the residue-positions. G46 is a pore-exposed residue.

**Supplemental Figure 8. The 3-dimensional neighborhood of V79 in the oligomeric complex.**

A. Docked model of hemichannel – viewed from the top. Two adjacent Cx50 subunits are colored. B. Two adjacent Cx50 subunits are shown to be arranged in similar relation as in the hexameric complex – viewed from pore side. C. Mutation-involving residue V79 (red) in one subunit (yellow) and T39 (green) of adjacent subunit (grey) lie within 4Å space.

**Supplemental Figure 9. The 3-dimensional neighborhood (surrounding 4Å space) of E201 in normal Cx50 protein (homology model).**

A. Residues lying within surrounding 4Å space of E201 are shown. B. A new H-bond with side-chain of R198 is formed by the mutation E201K. Green dotted line indicates potential H-bond - computed using the SwissPDBViewer.

**Supplemental Figure 10. The 3-dimensional neighborhood of E201 in the oligomeric complex.**

A. Docked model of hemichannel – viewed from the top. Two adjacent Cx50 subunits are colored. B. Two adjacent Cx50 subunits are shown to be arranged in similar relation as in

the hexameric complex – viewed from outer lipid-facing side. C. P71, I72, S73 and R76 (orange) of adjacent subunit (blue) lie within surrounding 4Å space of E201 (red). E201 forms inter-molecular H-bonding with S73 of adjacent subunit.

**Supplemental Figure 11. The 3-dimensional neighborhood (surrounding 4Å space) of E48 in normal Cx50 protein (homology model).**

A. Residues lying within surrounding 4Å space of E48 are shown. E48 (TM1) has inter-helix H-bonding with R76 (TM2). B. The H-bond of E48 with R76 is lost in the mutant E48K. Green dotted lines indicate potential H-bonds - computed using the SwissPDBViewer.

**Supplemental Figure 12. The 3-dimensional neighborhood of E48 in the oligomeric complex.**

A. Docked model of hemichannel – viewed from the top. Two adjacent Cx50 subunits are colored. B. Two adjacent Cx50 subunits are shown to be arranged in similar relation as in the hexameric complex – viewed from outer lipid-facing side. C. R198 (red) of adjacent subunit (yellow) lies within surrounding 4Å space of E48 (orange). E48 has inter-molecular H-bonding with R198 of adjacent subunit. Green dotted line indicates potential H-bond - computed using the SwissPDBViewer. D. The H-bond of E48 with R198 is lost in the mutant E48K.



**SUPPLEMENTARY TEXT:**

**CLUSTAL 2.1 multiple sequence alignment constructed by CLUSTALW2 server – 52% sequence similarity between human Cx50 protein sequence and human Cx26 protein sequence, which was used as template (PDB: 2ZW3) for homology modeling**

```
2ZW3      -MDWGTLQTLGGVNHSTSIGKIWLTVLFIFRIMILVVAAKEVWGDEQADFVNTLQPG 59
Cx50      MGDWSFLGNILEEVNEHSTVIGRVWLTVLFIFRILILGTAAEFVWGDEQSDFCNTQQPG 60
          ** . * .** **:*** **::*****:**. **: *****:***** ***

2ZW3      CKNVCYDHYFPISHIRLWALQLIFVSTPALLVAMH-VAYRRHEKKRKFGEIKSEFK-- 116
Cx50      CENVCYDEAFPIHSHIRLWVLIIFVSTPSLMYVGHAVHYVRMEEKRKSREAEELGQQAGT 120
          *:*****. *****.**:*****:*. . * * * * *:*** :.* .:

2ZW3      ----DIEEIK-----TQKVRIEGLWWTYTSSIFFRVIFEAAFMVVFYVMYDGFMSQR 165
Cx50      NGGPDQGSVKKSSGSKGTKFRLEGLLRITYICHIFKTLFEVGFIVGHYFLYG-FRILP 179
          * .:*          *:*.***:* ** . *:::***.*: .*:*.* * :

2ZW3      LVKCNWPCPNTVDCFVSRPTEKTVFTVFMIAVSGICILLNVTELCYLLIRYCSGKSKKP 225
Cx50      LYRCSRWPCPNVDCFVSRPTEKTIIFILFMLSVASVSLFLNVMEELGHLGLKGIRSAKRP 239
          * :*. *****.*****:**:***:*.:::*** ** :* :. . *:*

2ZW3      V 226
Cx50      V 240
          *
```

**CLUSTAL 2.0.10 multiple sequence alignment constructed by UNIREF90 – 150 non-redundant sequences homologous to human Cx50 were selected by PSI-BLAST and aligned**

*Input\_protein\_seq* denotes human Cx50 protein sequence (NP\_005258.2)

```
UniRef90_UPI0002C691BE_1_358      MGDWSVLGEFLEEVEVHKHSTVIGKVWLTVLFIFRILVLGAAAESSWGDEQE
UniRef90_F7BKC0_1_358             MGDWSYLAEFLEEVEVHKHSTEIGKVWLTVLFIFRILVLVTAAESSWGDEQA
UniRef90_Q0VCR2_1_359             MGDWSFLGEFLEEVEVHKHSTVIGKVWLTVLFIFRMLVLGTAAESSWGDEQA
UniRef90_G3TUX5_1_358             MGDWSFLGFEFLEEVEVHKHSTVIGKVWLTVLFIFRMLVLGTAAESSWGDEQA
UniRef90_L9JKN2_1_358             MGDWSFLGEFLEEVEVHKHSTVIGKVWLTVLFIFRMLVLGTAAESSWGDEQA
UniRef90_P36382_1_358             MGDWSFLGNFLEEVEVHKHSTVVGKVWLTVLFIFRMLVLGTAAESSWGDEQA
UniRef90_UPI0003315E33_1_350      MGDWSFLGEFLEEVEVHKHSTVIGKVWLTVLFIFRMLVLGTAAESSWGDEQA
UniRef90_UPI000333FB64_1_358      MGDWSFLGFEFLEEVEVHKQSTVIGKVWLTVLFIFRMLVLGTAAESSWGDEQA
UniRef90_UPI000334540D_1_357      MGDWSFLGEFLEEVEVHKHSTVIGKVWLTVLFIFRMLVLGTAAESSWGDEQA
UniRef90_L5K3R8_1_358            MGDWSFLGFEFLEEVEVHKHSTVIGKVWLTVLFIFRMLVLGTAAESSWGDEQA
UniRef90_G1TQ37_1_358            MGDWSFLGEFLEEVEVHKHSTVIGKVWLTVLFIFRMLVLGTAAESSWGDEQS
UniRef90_UPI0001776F40_1_352      MGDWSFLGFEFLEEVEVHKHSTVIGKVWLTVLFIFRMLVLGTAAESSWGDEKA
UniRef90_G3H2Q9_1_358            MGDWSFLGEFLEEVEVHKHSTVIGKVWLTVLFIFRMLVLGTAAESSWGDEQA
UniRef90_Q01231_1_358            MGDWSFLGFEFLEEVEVHKHSTVIGKVWLTVLFIFRMLVLGTAAESSWGDEQA
UniRef90_G5BBL6_1_357            MSDWSFLGAFLEEVEVHKHSTIIGKVWLTVLFIFRMLVLGTAAESSWGDEQA
UniRef90_H0WCZ7_1_358            MSDWSFLGAFLEEVEVHKHSTVIGKVWLTILFIFRMLVLGTAAESSWGDEQA
UniRef90_G3X1A3_1_358            MGDWSFLGEFLEEVEVHKHSTVIGKVWLTVLFIFRMLVLGTAAESSWGDEQA
UniRef90_H0ZT11_1_370            MGEWSFLGDFLEKVVHKHSTVVGKVWLTVLFIFRMLVLGTAAESSWGDEQS
UniRef90_P18860_1_369            MGDWSFLGEFLEEVEVHKHSTVVGKVWLTVLFIFRMLVLGTAAGPLWGDEQS
UniRef90_G1KPB5_1_370            MGDWSFLGFEFLEEVEVHKHSTVVGKVWLTVLFIFRMLVLGTAAESSWGDEQS
UniRef90_K7FWT6_1_369            MDNWSFLGFEFLEEVEVHKHSTVVGKVWLTVLFVFRMLVLGTAAESSWGDEQS
UniRef90_F1QL21_1_400            MGDWSLLGNFLEEVEVQEHSTVSGKVWLTVLFIFRILVLGTAAESSWGDEQS
UniRef90_UPI0002A497DC_1_408      MADWSLLGNFLEEVEVQEHSTVSGKVWLTILFIFRILVLGTAAESSWGDEQE
Input_protein_seq                 MGDWSFLGNILEEVNEHSTVIGRVWLTVLFIFRILILGTAAEFVWGDEQS
UniRef90_UPI00027FC10C_1_397      MGDWSFLGSILEEVEVNEHSTVIGRVWLTVLFIFRILILGTAAEFVWGDEQS
UniRef90_L9JGQ0_1_441            MGDWSFLGNILEEVNERSTVIGRVWLTVLFIFRILILGTAAEFVWGDEQS
UniRef90_P28236_1_440            MGDWSFLGNILEEVNEHSTVIGRVWLTVLFIFRILILGTAAEFVWGDEQS
UniRef90_G5BBL7_1_440            MGDWSFLGNILEEVNEHSTVIGRVWLTVLFIFRILILGTAAEFVWGDEQS
UniRef90_M3XED1_1_440            MGDWSFLGNILEEVNEHSTVIGRVWLTVLFIFRILILGTAAEFVWGDEQS
UniRef90_L5K685_1_440            MGDWSFLGNILEEVNEHSTVIGRVWLTVLFIFRILILGTAAEFVWGDEQS
UniRef90_F6VG96_1_441            MGDWSFLGNILEEVNEHSTVIGRVWLTVLFIFRILILGTAAEFVWGDEQS
UniRef90_P55917_1_440            MGDWSFLGNILEEVNEHSTVIGRVWLTVLFIFRILILGTAAEFVWGDEQS
UniRef90_UPI000329268E_1_442      MGDWSFLGNILEEVNEHSTVIGRVWLTVLFIFRILILGTAAEFVWGDEQS
UniRef90_G3UBH4_1_410            MGDWSFLGNILEEVNEHSTVIGRVWLTVLFIFRILILGTAAEFVWGDEQS
UniRef90_I3N7I6_1_431            MGDWSFLGNILEEVNEHSTVIGRVWLTVLFIFRILILGTAAEFVWGDEQS
UniRef90_G3X210_1_429            MGDWSFLGNILEEVNEHSTVIGRVWLTVLFIFRILILGTAAEFVWGDEQS
UniRef90_F7BI06_1_372            MGDWSFLGNILEEVNEHSTVIGRVWLTVLFIFRILILGTAAEFVWGDEQS
UniRef90_UPI000333FA9E_1_424      MGDWSFLGNILEEVNEHSTVIGRVWLTVLFIFRILILGTAAEFVWGDEQS
UniRef90_K7EY71_1_406            MGDWSFLGNILEEVNEHSTVIGRVWLTVLFIFRILILGTAAEFVWGDEQS
UniRef90_M7BCA4_1_394            MGDWSFLGNILEEVNEHSTVIGRVWLTVLFIFRILILGTAAEFVWGDEQS
UniRef90_P36381_1_400            MGDWSFLGNILEQVNEQSTVIGRVWLTVLFIFRILILGTAAEVWGDEQS
UniRef90_L2MUH4_1_428            MGDWSFLGNILEEVNEHSTVIGRVWLTVLFIFRILILGTAAEFVWGDEQS
UniRef90_UPI00022B4A0D_1_396      MGDWSFLGNILEEVNEHSTVIGRVWLTVLFIFRILILGTAAEFVWGDEQS
UniRef90_H3D8V1_1_361            MGDWSFLGNILEEVNEHSTVIGRVWLTVLFIFRILILGTAAEFVWGDEQS
UniRef90_G3NHJ7_1_420            MGDWSFLGNILEEVNEHSTVIGRVWLTVLFIFRILILGTAAEFVWGDEQS
UniRef90_Q503J6_1_391            MGDWSFLGNILEEVNEHSTVIGRVWLTVLFIFRILILGTAAEFVWGDEQS
UniRef90_F6QCF2_1_438            MGDWSFLGNILEEVNEHSTVIGRVWLTVLFIFRILILGTAAEFVWGDEQS
UniRef90_UPI00034FAB61_1_453      MGDWSFLGNILEEVNEHSTVIGRVWLTVLFIFRILILGTAAEFVWGDEQS
UniRef90_UPI0001DE8510_1_439      MGDWSFLGNILEEVNEHSTVIGRVWLTVLFIFRILILGTAAEFVWGDEQS
UniRef90_H3A837_1_370            MGDWSFLGNILEEVNEHSTVIGRVWLTVLFIFRILILGTAAEFVWGDEQS
UniRef90_G1KPB7_1_391            MGDWSFLGNILEEVNEHSTVIGRVWLTVLFIFRILILGTAAEFVWGDEQS
UniRef90_B0S6Z4_1_382            MGDWSFLGNILEEVNEHSTVIGRVWLTVLFIFRILILGTAAEFVWGDEQS
UniRef90_G1PZ72_1_426            MGDWSFLGNILEEVSEHSTAVGRVWLTVLFIFRILILGTAAEVWGDEQA
UniRef90_UPI000155FB82_1_448      MGDWSFLGKLLLENAQEHSTVIGKVWLTVLFIFRILVLGAAAEVWGDEQS
UniRef90_F6U7L2_1_428            MGDWSFLGKLLLENAQEHSTVIGKVWLTVLFIFRILVLGAAAEVWGDEQS
UniRef90_UPI0002C6341D_1_440      MGDWSFLGRLLLENAQEHSTIIGKVWLTVLFIFRILVLGAAAEVWGDEQS
UniRef90_M3Z8M0_1_445            MGDWSFLGRLLLENAQEHSTVIGKVWLTVLFIFRILVLGAAAEVWGDEQS
UniRef90_G1Q1M8_1_411            MGDWSFLGRLLLENAQEHSTVIGKVWLTVLFIFRILVLGAAAEVWGDEQS
UniRef90_G1PYG2_1_394            MGDWSLLGRLLDQAQGHSTVIGKVWLTVLFIFRILLGAGVESVWGDEQS
UniRef90_L5L5Q1_1_430            MGDWSFLGRLLLENAQEHSTVIGKVWLTVLFIFRILVLGAGVESVWGDEQS
UniRef90_UPI0002BCF55A_1_410      MGDWSFLGRLLLENAQEHSTVVGKVWLTVLFIFRILVLGAAAEVWGDEQS
UniRef90_P41987_1_407            MGDWSFLGRLLLENAQEHSTVIGKVWLTVLFIFRILVLGAAAEVWGDEQS
UniRef90_J9JHI9_1_433            MGDWSFLGRLLLENAQEHSTVIGKVWLTVLFIFRILVLGAAAEVWGDEQS
UniRef90_Q9Y6H8_1_435            MGDWSFLGRLLLENAQEHSTVIGKVWLTVLFIFRILVLGAAAEVWGDEQS
UniRef90_G3QHB2_1_399            MGDWSFLGRLLLENAQEHSTVIGKVWLTVLFIFRILVLGAAAEVWGDEQS
```







UniRef90\_UPI0003316158\_1\_413  
UniRef90\_G3WUN4\_1\_443  
UniRef90\_F6W379\_1\_264  
UniRef90\_M7BL54\_1\_431  
UniRef90\_UPI0002B44362\_1\_276  
UniRef90\_UPI000298933C\_1\_429  
UniRef90\_H3CDZ2\_1\_426  
UniRef90\_I3IZH7\_1\_440  
UniRef90\_E7F3P4\_1\_389

AFVCNTQQPGCSNVCYDDAFPI-SLIRFWVLQIIFVSSPSLVYMGHALYR  
AFTCNTRQPGCRNICYDGAFPI-SLIRYWVLQVIFVSSPSLVYMGHALYR  
EFICNTEQPGCRNVCYDQAFPI-SLIRYWVLQIIFVSSPSLVYMGHALYR  
EFICNTEQPGCSNVCYDKAFPI-SLIRYWVLQIIFVSSPSLVYMGHALYR  
EFICNTEQPGCNNICYDKAFPI-SLIRYWVLQIIFVSSPSLVYMGHALYR  
EFVCNTEQPGCKNVCYDQAFPV-SLIRYWVLQIIFVSSPSLVYMGHALYR  
EFVCNTEQPGCKNVCYDQAFPV-SLIRYWVLQIIFVSSPSLVYMGHALYR  
EFVCNTEQPGCKTVCYDQAFPI-SLIRYWVLQIIFVSSPSLVYMGHALYR  
EFVCNTEQPGCKNVCYDQAFPI-SLIRYWVLQIIFVSSPSLVYMGHALYR  
: \*: : \*\*\* \*\* \* . . : : :\*:\*: : :

UniRef90\_UPI0002C691BE\_1\_358  
UniRef90\_F7BK0\_1\_358  
UniRef90\_Q0VCR2\_1\_359  
UniRef90\_G3TUX5\_1\_358  
UniRef90\_L9JKN2\_1\_358  
UniRef90\_P36382\_1\_358  
UniRef90\_UPI0003315E33\_1\_350  
UniRef90\_UPI000333FB64\_1\_358  
UniRef90\_UPI000334540D\_1\_357  
UniRef90\_L5K3R8\_1\_358  
UniRef90\_G1TQ37\_1\_358  
UniRef90\_UPI0001776F40\_1\_352  
UniRef90\_G3H2Q9\_1\_358  
UniRef90\_Q01231\_1\_358  
UniRef90\_G5BBL6\_1\_357  
UniRef90\_H0WCZ7\_1\_358  
UniRef90\_G3X1A3\_1\_358  
UniRef90\_H0ZT11\_1\_370  
UniRef90\_P18860\_1\_369  
UniRef90\_G1KPB5\_1\_370  
UniRef90\_K7FWT6\_1\_369  
UniRef90\_F1QL21\_1\_400  
UniRef90\_UPI0002A497DC\_1\_408  
Input\_protein\_seq  
UniRef90\_UPI00027FC10C\_1\_397  
UniRef90\_L9JGQ0\_1\_441  
UniRef90\_P28236\_1\_440  
UniRef90\_G5BBL7\_1\_440  
UniRef90\_M3XED1\_1\_440  
UniRef90\_L5K685\_1\_440  
UniRef90\_F6VG96\_1\_441  
UniRef90\_P55917\_1\_440  
UniRef90\_UPI000329268E\_1\_442  
UniRef90\_G3UBH4\_1\_410  
UniRef90\_I3N716\_1\_431  
UniRef90\_G3X210\_1\_429  
UniRef90\_F7BI06\_1\_372  
UniRef90\_UPI000333FA9E\_1\_424  
UniRef90\_K7EY71\_1\_406  
UniRef90\_M7BCA4\_1\_394  
UniRef90\_P36381\_1\_400  
UniRef90\_H2MUH4\_1\_428  
UniRef90\_UPI00022B4A0D\_1\_396  
UniRef90\_H3D8V1\_1\_361  
UniRef90\_G3NHJ7\_1\_420  
UniRef90\_Q503J6\_1\_391  
UniRef90\_F6QCF2\_1\_438  
UniRef90\_UPI00034FAB61\_1\_453  
UniRef90\_UPI0001DE8510\_1\_439  
UniRef90\_H3A837\_1\_370  
UniRef90\_G1KPB7\_1\_391  
UniRef90\_B0S6Z4\_1\_382  
UniRef90\_G1PZ72\_1\_426  
UniRef90\_UPI000155FB82\_1\_448  
UniRef90\_F6U7L2\_1\_428  
UniRef90\_UPI0002C6341D\_1\_440  
UniRef90\_M3Z8M0\_1\_445  
UniRef90\_G1Q1M8\_1\_411  
UniRef90\_G1PYG2\_1\_394  
UniRef90\_L5L5Q1\_1\_430  
UniRef90\_UPI0002BCF55A\_1\_410  
UniRef90\_P41987\_1\_407  
UniRef90\_J9JHI9\_1\_433  
UniRef90\_Q9Y6H8\_1\_435  
UniRef90\_G3QHB2\_1\_399

VRMQKRRKL-REAER---AKDVRGAGS-----YEYVPAE  
VRMQEKQRQ-REAER---AKHVQGAGS-----YEYVPAE  
VRVQEKRRLLREAER---AKEARAAGS-----YEYVPAE  
VRMQEKRRKL-REAER---AKGVQGS GS-----YEYVPAE  
VRMQEKRRKL-REAER---AKEVRGAGS-----YEYVVE  
VRMQEKRRKL-REAER---AKEVRGSGS-----YEYVPAE  
VRMQEKRRRL-REAER---AKEVQGAG-----YEYPAE  
MRMQEKRRRL-RAAER---AKEVRGAGS-----YEYVPAE  
VRVQEKRRRL-REAER---ARDVRAAG-----YEYPAE  
VRMEEKRKL-REAER---AREARGAGP-----CEYVGE  
VRMQEKRRKL-REAET---GKEVQGAGS-----YEYPAE  
VRMQEKRRKL-RETQG---TKEGRGAGS-----YEYPAE  
VRMQEKQKL-RDAEK---AKEAGATGS-----YEYVPAE  
VRMQEKQKL-RDAEK---AKEAHTGA-----YEYVPAE  
VRMQEKRRRL-REAER---AKEIHRPGS-----YEYQVAE  
VRMQEKRRKL-REAER---AKEIHRPGSP-----YEFQVAE  
VRMEEKRKL-KEAEK---SKESKGADT-----YAYQT-E  
VRMEEKRKMKEAEIE---ARENKNGGDTY-----YQQKCSVAE  
VRMEEKRKMKEAERE---AQEMKNSGDTY-----YQQKCPVAE  
VRMEEKRKLKEAEG---SKAIQSKSDVF-----HQQEYPPPE  
VRMEEKRKLKEAEMR---AKGIRSSGDSY-----HQQEYPAE  
VRMEEKRKLKQK-----EQEKAEGAGK-----GEKEYLE  
VRMEEKRRSRQEDDRDGGGEEEDQGGGGK-----VERKGEK  
VRMEEKRSREAEEL---GQQAGTNG-----G-----PD  
VRMEEKRRGR-----G-----PD  
VRMEEKRKDREAEEL---CQQSAANG-----GDRAPLTPD  
VRMEEKRKDREAEEL---CQQSRSNG-----GERVPIAPD  
VRMEEKRKDREAEV---SQQSRSNG-----CERGPLAPD  
VRMQEKRRKEREADEL---CQQGAAEG-----GDRAPLAAD  
VRMEEKRKEREAEEL---CQQAAGDS-----GERGPLPAD  
VRMEEKRKEREAEEL---GQQPPGN-----GERAPPAAD  
VRMEEKRKEREAEEL---SQQSPGNG-----GERAPLAAD  
VRMEEKRKEREAEEL---CQQSGGNG-----GDRAPLPPD  
LRMEEKRKEREAEEL---CQQPPGNG-----PEKGPVAPD  
VRMQEKRREREAEEL---PAAER-----AD  
VRMEEKRKEREAEV---CQQSGSN-----GERLPLALD  
VRMEEKRKEREAEV---CQQSGGN-----GERLPLALD  
VRMQEKRKEREVEEL---CPQPPGNG-----AERGPLGPD  
VRMVEKRREREQAER---QQQAEMD-----EERLPLTPD  
VRMAEKRREREQAER---QQQAEMD-----EERLPLAPD  
VRMEEKRKEREAEAER---RQQAQEV-----EERLPLAPN  
VHMEEKRKEREAEAEL---SRQQELS-----EERLPLAPD  
VHMEEKRKEREAEAEL---SRQQELS-----EERLPLAPD  
VHMEEKRKEREAEAEL---SRQQELS-----EERLPLAPD  
VHMEEKRKEREAEAEL---NRQQEN-----EERLPLAPD  
VRMKNWKEREAEAEM---SRQQEMN-----EERLPLAPD  
VRMEEKRKEREAEAEM---SRQQEMN-----EERLPLAPD  
VRMKNWKEREAEAEM---SRQQEMN-----EERLPLAPD  
VRMEEKRKEREAEAEL---SRQQELN-----EERLPLAPD  
VRMEEKRREREAEAER---ALQQQDERE-----DEKSSLDPE  
IHMEEKRKEREAEAEM---SHQQELCE-----ERQAMD  
ARAEEKRASRVAVVW---LGGGIWLS-----G-----G  
VRMEEKKKEREELPL---KGDNLHHEPA-----GPCGLSSDS  
VRMEEKKKEREELPL---KGDNLHHEPA-----GPCGLSSDS  
VRMEEKKKEREELQL---KGGHLPKPA-----GPCG---  
VRMEEKKKEREELLL---KSD---GPA-----ARCGSGSH  
VRMEEKKKGREELKL---KGGSLHLRPD-----GQCGPRNHS  
VRMEEKKKGREELQA---KGES-----DHG  
VRTEQKRKERDAEQP---NGDG-----DRG  
VRMEEKRKEREELERL---KADGP-----PL  
VRMEEKRKEREELPP---KAAGP-----EG  
VRMEEKKKEREELLL---RAELPHPGA-----ARCG---PG  
VRMEEKKKEREELLL---LKRE-----SPSPKEPPQ  
VR-----SPSPKEPPQ



UniRef90\_UPI0003316158\_1\_413  
UniRef90\_G3WUN4\_1\_443  
UniRef90\_F6W379\_1\_264  
UniRef90\_M7BL54\_1\_431  
UniRef90\_UPI0002B44362\_1\_276  
UniRef90\_UPI000298933C\_1\_429  
UniRef90\_H3CDZ2\_1\_426  
UniRef90\_I3IZH7\_1\_440  
UniRef90\_E7F3P4\_1\_389

LRTFEKERQKRKAHLRAHLEDPELEWEEQQ-----RIERE  
LRAFEKEKQKRKQVQLRAQLEPELDQEEYQ-----RIERE  
LRALEKERQKKAQLRAELELEVVVDEHR-----KLERE  
LRALEKERQKKTTHLRAQLELEPVPEEHK-----RMERE  
LRALEKERQNRKAHLRAQLEGLEPMLLEEHK-----RVERE  
LRTLEKERHRRKVCLKAELEGTDPVLEDHK-----RIERE  
LRTLEKERHRRKACLKAELEGTDPVLEDHR-----RIERE  
LRTLEKERHRRKACLKAELEGTDPVLEDHK-----RIEKE  
LRALEKERHKKKQVQLKVELEESE-ALEEHEK-----RIEKE

UniRef90\_UPI0002C691BE\_1\_358  
UniRef90\_F7BKC0\_1\_358  
UniRef90\_Q0VCR2\_1\_359  
UniRef90\_G3TUX5\_1\_358  
UniRef90\_L9JKN2\_1\_358  
UniRef90\_P36382\_1\_358  
UniRef90\_UPI0003315E33\_1\_350  
UniRef90\_UPI000333FB64\_1\_358  
UniRef90\_UPI000334540D\_1\_357  
UniRef90\_L5K3R8\_1\_358  
UniRef90\_G1TQ37\_1\_358  
UniRef90\_UPI0001776F40\_1\_352  
UniRef90\_G3H2Q9\_1\_358  
UniRef90\_Q01231\_1\_358  
UniRef90\_G5BBL6\_1\_357  
UniRef90\_H0WCZ7\_1\_358  
UniRef90\_G3XIA3\_1\_358  
UniRef90\_H0ZTI1\_1\_370  
UniRef90\_P18860\_1\_369  
UniRef90\_G1KPB5\_1\_370  
UniRef90\_K7FWT6\_1\_369  
UniRef90\_F1QL21\_1\_400  
UniRef90\_UPI0002A497DC\_1\_408  
Input\_protein\_seq  
UniRef90\_UPI00027FC10C\_1\_397  
UniRef90\_L9JGQ0\_1\_441  
UniRef90\_P28236\_1\_440  
UniRef90\_G5BBL7\_1\_440  
UniRef90\_M3XED1\_1\_440  
UniRef90\_L5K685\_1\_440  
UniRef90\_F6VG96\_1\_441  
UniRef90\_P55917\_1\_440  
UniRef90\_UPI000329268E\_1\_442  
UniRef90\_G3UBH4\_1\_410  
UniRef90\_I3N716\_1\_431  
UniRef90\_G3X210\_1\_429  
UniRef90\_F7BI06\_1\_372  
UniRef90\_UPI000333FA9E\_1\_424  
UniRef90\_K7EY71\_1\_406  
UniRef90\_M7BCA4\_1\_394  
UniRef90\_P36381\_1\_400  
UniRef90\_H2MUH4\_1\_428  
UniRef90\_UPI00022B4A0D\_1\_396  
UniRef90\_H3D8V1\_1\_361  
UniRef90\_G3NHJ7\_1\_420  
UniRef90\_Q503J6\_1\_391  
UniRef90\_F6QCF2\_1\_438  
UniRef90\_UPI00034FAB61\_1\_453  
UniRef90\_UPI0001DE8510\_1\_439  
UniRef90\_H3A837\_1\_370  
UniRef90\_G1KPB7\_1\_391  
UniRef90\_B0S6Z4\_1\_382  
UniRef90\_G1PZ72\_1\_426  
UniRef90\_UPI000155FB82\_1\_448  
UniRef90\_F6U7L2\_1\_428  
UniRef90\_UPI0002C6341D\_1\_440  
UniRef90\_M3Z8M0\_1\_445  
UniRef90\_G1Q1M8\_1\_411  
UniRef90\_G1PYG2\_1\_394  
UniRef90\_L5L5Q1\_1\_430  
UniRef90\_UPI0002BCF55A\_1\_410  
UniRef90\_P41987\_1\_407  
UniRef90\_J9JHI9\_1\_433  
UniRef90\_Q9Y6H8\_1\_435  
UniRef90\_G3QHB2\_1\_399

K-----AELSCWEEENGKIVLQGTLLNTYVCSILIRTTMEVAFI  
K-----TALSCWEEGNEKIVLQGTLLNTYVCSILIRTTMEVAFI  
K-----TELSCWEEVNGRIALQGSLLNTYVCSILIRTTMEVAFI  
K-----TELSCWEEVNGKVVVQGALLNTYVCSILIRTTMEVTFI  
K-----TELSCWEEVNGKIVLQGTLLNTYVCSILIRTTMEVAFI  
K-----AELSCWEEGNGRIALQGTLLNTYVCSILIRTTMEVAFI  
K-----TGLSCWEEVNGKIVLQGTLLNTYVCSILIRTTMEVAFI  
K-----TELTWCWEEVNGKVVVQGTLLNTYVCSILIRTTMEVAFI  
K-----PELSCWEEVNGRIVLQGTLLNTYVCSILIRTTMEVAFI  
K-----AELSCWEEANGRIVLRGTLNTYVCSILIRTTMEVAFI  
K-----AELSRWEEVNGRIILRGTLNTYVCSIVIRTTVEVAFI  
K-----TELSCWEEVNGRIVLQGTLLHTYVCSIIIRTTTEVAFI  
K-----AELSCWKEVDGKIVLQGTLLNTYVCTILIRTTMEVAFI  
K-----AELSCWKEVDGKIVLQGTLLNTYVCTILIRTTMEVAFI  
K-----PELSCWEEVNGKVVVQGNLLNTYVCTILIRTTMEVAFI  
K-----PELSCWEEVNGKVVVQGNLLNTYVCTILIRTTMEVAFI  
K-----AELSCREELDGKIIILQGTLLNTYVCSILIRTTMEVAFI  
KE-----TKLSGWDEAGGQIILRGSLLNTYVCSILIRTTMEVAFI  
K-----TELSCWDESGGKIIILRGSLLNTYVCSILIRTTMEVAFI  
K-----AELSCWDDSNGRIIILQGTLLNTYVCSILIRTTMEVAFI  
K-----AEFSSREEENSGKIIILQGSLLNTYVCSILIRTTMEVTFI  
H-----KEKFENTKT-KIHLKALLQTYVLSIVIRLVMVETFI  
D-----EEKGERPPVGRIRLRGALLKTYVLSILIRSVMEVVF  
QGS-----VKKSS-GS-KGTTKFRLEGTLRRTYIICHIFKTLFEVGF  
-----AGTLRRTYIICHIFKTLFEVGFV  
QGS-----IRKSS-SSSKGTTKFRLEGTLRRTYIICHIFKTLFEVGF  
QAS-----IRKSS-SSSKGTTKFRLEGTLRRTYIICHIFKTLFEVGF  
QAS-----IRKSN-SSSKGTTKFRLEGTLRRTYIICHIFKTLFEVGF  
QGS-----VKKGS-NSSKGTTKFRLEGTLRRTYIICHIFKTLFEVGF  
QGS-----IKKSS-SSSKGTTKFRLEGTLRRTYIICHIFKTLFEVGF  
QCS-----IKKGG-GSGKTTKFRLEGTLRRTYIICHIFKTLFEVGF  
QGS-----VKKSS-SSSKGTTKFRLEGTLRRTYIICHIFKTLFEVGF  
QGS-----LKKSS-SSSKGTTKFRLEGTLRRTYIICHIFKTLFEVGF  
QGS-----IKKSS-SS-RSTKFRLEGTLRRTYIICHIFKTLFEVGF  
QGS-----VRKGS-GSSQAKKFRLEGTLRRTYLCHIVKTLFEVGF  
QGS-----TKKSS-NSTKGTKFRLEGTLRRTYIICHIFKTLFEVGF  
QGS-----TKKSS-NSTKGTKFRLEGTLRRTYIICHIFKTLFEVGF  
QGS-----LKKGS-SCSRSTKQFRLEGTLRRTYIICHIFKTLFEVGF  
QED-----IRNTNEINPKGAKKFRLEGTLRRTYIICHIFKALFEVGF  
QES-----TRNTNEINPKGAKKFRLEGTLRRTYIICHIFKALFEVGF  
QNK-----GN-----NPDGTTKFRLEGTLRRTYIICHIFKTLFEVGF  
QGS-----VRTTKETSTKGSKKFRLEGTLRRTYIICHIFKTLFEVGF  
QGS-----VRTTKETSTKGSKKFRLEGTLRRTYIICHIFKTLFEVGF  
QGS-----VRTTKETSTKGSKKFRLEGTLRRTYIICHIFKTLFEVGF  
QGS-----VRTAKETSTKGSKKFRLEGTLRRTYIICHIFKTLFEVGF  
QGS-----IRTTKETSTKGTKFRLEGTLRRTYIICHIFKTLFEVGF  
QGS-----IRTTKETSTKGTKFRLEGTLRRTYIICHIFKTLFEVGF  
QGS-----IRTTKETSTKGTKFRLEGTLRRTYIICHIFKTLFEVGF  
QGS-----VRTTKDTSTKATKFRLEGTLRRTYIICHIFKTLFEVGF  
QKS-----P-----VSTKGTKFRLEGTLRRTYIICHIFKTLFEVGF  
QGS-----VRTAKETSTKGSKKFRLEGTLRRTYIICHIFKALFEVGF  
-----LSWALPLRAPRLEGPLRRTYVGHIAACKSLLEAGFV  
Q-----DTPPVRDRGKVR IAGALLRRTYVFNIIFKTLFEVGF  
Q-----DTPPVRDRGKVR IAGALLRRTYVFNIIFKTLFEVGF  
-----PPVRDRGKVRITGALLRRTYVFNIIFKTLFEVGF  
Q-----KDKPPVRDRGKVR IAGALLRRTYVFNIIFKTLFEVGF  
Q-----KDKFILQDNRGKVR IAGALLRRTYVFNIIFKTLFEVGF  
Q-----KNRPLVRDDQGV IAGALLRRTYVFNIIFKMLFEVGF  
Q-----RDRSPVRDRGKVR IAGALLRRTYVFNIIFKTLFEVGF  
G-----QDRPPVRDRGKVR IAGALLRRTYVFNIIFKTLFEVGF  
H-----QDPAPVRDRGKVR IAGALLRRTYVFNIIFKTLFEVGF  
G-----QKDRPLRDRGRVRIAGALLRRTYVFNIIFKTLFEVGF  
-----DNPSRDRDRGRVRIAGALLRRTYVFNIIFKTLFEVGF  
-----DNPSRDRDRGRVRIAGALLRRTYVFNIIFKTLFEVGF



UniRef90\_F7B1T8\_1\_432 -----DRPSSREDRGRVVMAGALLRITYVFNIIFKTLLEVGFIR  
UniRef90\_L9L2D3\_1\_460 R-----EDPGKVRDRGKVRIRAGALLRITYVFNIIFKTLFEVGFIS  
UniRef90\_Q64448\_1\_417 S-----PRDPPLRDRGKVRIRAGALLRITYVFNIIFKTLFEVGFIS  
UniRef90\_G3H8J5\_1\_417 S-----PRDPPLRDRGKVRIRAGALLRITYVFNIIFKTLFEVGFIS  
UniRef90\_UPI0003333DA4\_1\_405 G-----IPVRDRGKVRIRAGALLRITYVFNIIFKTLFEVGFIS  
UniRef90\_I3NC37\_1\_417 S-----QDKTVVRDRGKVRIRAGALLRITYVFNIIFKTLFEVGFIS  
UniRef90\_H0XD37\_1\_430 -----KLPVRDRGKVRIRAGALLRITYVFNIIFKTLFEVGFIS  
UniRef90\_G1U3S9\_1\_407 K-----PAAP-VRDRGKVRIRAGALLRITYVFNIIFKTLFEVGFIS  
UniRef90\_UPI00032AEFC1\_1\_413 L-----PAAP-VRD--GKVRIRAGALLRITYVFNIIFKTLFEVGFIS  
UniRef90\_UPI00034F30A8\_1\_402 A-----PDQAPGSEERGRVVMAGALLRITYVFNIIFKTLFEVGFIS  
UniRef90\_UPI0003340A67\_1\_370 T-----QELA-GREERGRVVMAGALLRITYVFNIIFKTLFEVGFIS  
UniRef90\_UPI0002234D0E\_1\_449 K-----REKLPVRDRGRVIRAGALLRITYVFNIIFKTLFEVGFIS  
UniRef90\_G3TTN5\_1\_429 K-----REKLPVRDRGRVIRAGALLRITYVFNIIFKTLFEVGFIS  
UniRef90\_UPI0002C457ED\_1\_447 K-----RKKPPVRDRGRVQIAGALLRITYVFNIIFKTLFEVGFIS  
UniRef90\_UPI000333D50E\_1\_427 K-----RQKLPIDDRGRVIRAGALLRITYVFNIIFKTLFEVGFIS  
UniRef90\_UPI0003343FBC\_1\_423 A-----KDRPPALDELGRVIRAGALLRITYVFNIIFKTLFEVGFIS  
UniRef90\_F7G5V2\_1\_446 E-----KKERPPIRDGRGKVRIRAGALLRITYVFNIIFKTLFEVGFIS  
UniRef90\_G3VY19\_1\_428 E-----KKEKPPIRDGRGKVRIRAGALLRITYVFNIIFKTLFEVGFIS  
UniRef90\_UPI000155BBAC\_1\_459 EPLLGREVAGGKKEPPVRDEWQKVRIRAGALLRITYVFNIIFKTLFEVGFIS  
UniRef90\_F7EY8\_1\_425 EPLLGREVAGGKKEPPVRDEWQKVRIRAGALLRITYVFNIIFKTLFEVGFIS  
UniRef90\_I3KXW1\_1\_474 GGGGG---GGGKKEKPPIRDEHGKIRIRGALLRITYVFNIIFKTLFEVGFIS  
UniRef90\_UPI00022B3AE8\_1\_449 GGGGG---GGGKKEKPPIRDEHGKIRIRGALLRITYVFNIIFKTLFEVGFIS  
UniRef90\_UPI0002A48057\_1\_447 -----GGGKKEKPPIRDEHGKIRIRGALLRITYVFNIIFKTLFEVGFIS  
UniRef90\_H2MCD5\_1\_421 -----GGGKKEKPPIRDEHGKIRIRGALLRITYVFNIIFKTLFEVGFIS  
UniRef90\_H2UTF3\_1\_420 -----GGGKKEKPPIRDEHGKIRIRGALLRITYVFNIIFKTLFEVGFIS  
UniRef90\_UPI000298F1F6\_1\_460 -----GGGKKEKPPIRDEHGKIRIRGALLRITYVFNIIFKTLFEVGFIS  
UniRef90\_H3DE08\_1\_376 -----GGGKKEKPPIRDEHGKIRIRGALLRITYVFNIIFKTLFEVGFIS  
UniRef90\_Q8JFD2\_1\_434 PGGRG---GGGKKEKPPIRDEHGKIRIRGALLRITYVFNIIFKTLFEVGFIS  
UniRef90\_H2T4Y1\_1\_438 GSR----GGGKKEKPPIRDEHGKIRIRGALLRITYVFNIIFKTLFEVGFIS  
UniRef90\_H2T4Y2\_1\_428 GSR----GGGKKEKPPIRDEHGKIRIRGALLRITYVFNIIFKTLFEVGFIS  
UniRef90\_H3BZL0\_1\_378 GGR----GGGKKEKPPIRDEHGKIRIRGALLRITYVFNIIFKTLFEVGFIS  
UniRef90\_I3K1N0\_1\_478 -----GGGKKEKPPIRDEHGKIRIRGALLRITYVFNIIFKTLFEVGFIS  
UniRef90\_H2LFL5\_1\_470 -----KGGKKDKRPIDREHGKIRIRGALLRITYVFNIIFKTLFEVGFIS  
UniRef90\_M7BWJ7\_1\_486 NNSSTNKEPPPKKEKPPIRDERGKIRISGALLRITYVFNIIFKTLFEVGFIS  
UniRef90\_K7F163\_1\_492 NNNSTTKKEPPPKKEKPPIRDERGKIRISGALLRITYVFNIIFKTLFEVGFIS  
UniRef90\_H0ZM32\_1\_512 SNVKDQSIIVKRGKELPIRDERGRIRMGGALLRITYVFNIIFKTLFEVGFIS  
UniRef90\_H3AH16\_1\_396 -----KKQKLPIDREHGKIRISGALLRITYVFNIIFKTLFEVGFIS  
UniRef90\_B0BM18\_1\_388 -----KKEKPPIDREHGKIRISGALLRITYVFNIIFKTLFEVGFIS  
UniRef90\_Q4S8R0\_1\_345 -----KPKKAPIKDNQGHVRLQGALLRITYVFNIIFKTLFEVAFI  
UniRef90\_I3KYH7\_1\_341 -----KDKKPSVKDKQGHARLQGALLRITYVFNIIFKTLFEVAFI  
UniRef90\_H2M0G7\_1\_345 -----AAKTSVKDNQGHVRLQGALLRITYVFNIIFKTLFEVAFI  
UniRef90\_H3A471\_1\_360 P-----KNPKVSIRDQGGKIRMGALLRITYVFNIIFKTLFEVGFIS  
UniRef90\_Q6GLA5\_1\_353 N-----KPAKPPVKDDLKGVRLRGALLRITYVFNIIFKTMFEVGFIS  
UniRef90\_UPI0002A4A1D5\_1\_346 A-----KPNKPPIRDEKGRVRLQGEALLRITYVFNIIFKTLFEVGFIS  
UniRef90\_S4RXA6\_1\_456 P-----PKLRKTYVNDQGGKVICGALLRITYVLSIFSRITFEVGFIS  
UniRef90\_P16863\_1\_360 -----LEEHGKVKMRGGLRITYIISILFKSVFEVGFIS  
UniRef90\_H2LU51\_1\_404 MK-----QLE-QGKLNKAPLRGSLLCITYVAHIVTRSVVEVSFMS  
UniRef90\_I3KYL3\_1\_401 MR-----QLE-QGKLNKAPLRGSLLCITYVAHIVTRSVVEVSFMS  
UniRef90\_G3NC44\_1\_402 MK-----LLE-QGKLNKAPLRGSLLCITYLVHIVTRSVVEVSFMS  
UniRef90\_H2SSL2\_1\_392 MR-----QLE-QGKLNKAPLRGSLLCITYVAHIVTRSLVEVSFMS  
UniRef90\_UPI0002C46B7E\_1\_433 LC-----QLE-QRKLKAPLRGTLTLLCTYVIHIFTRSAVEVGFMS  
UniRef90\_G3ULF1\_1\_432 LC-----QLE-QRKLKAPLRGMLTLLCTYVIHIFTRSAVEVGFMS  
UniRef90\_C9IYK1\_1\_407 LC-----QLE-KRKLKAPLRGTLTLLCTYVIHIFTRSVVEVGFMS  
UniRef90\_H0Y0G7\_1\_436 LC-----QLE-KRKLKAPLRGTLTLLCTYVIHIFTRSVVEVGFMS  
UniRef90\_L9JD22\_1\_408 LC-----QLE-QRKLKAPLRGTLTLLCTYVIHIFTRSVVEVGFMS  
UniRef90\_F1N617\_1\_436 LC-----QLE-QRKNKAPLRGTLTLLCTYVIHIFTRSVVEVGFMS  
UniRef90\_F1SV25\_1\_385 LY-----QLE-QWKLKAPLRGTLTLLCTYVIHIFTRSVVEVGFMS  
UniRef90\_L5JUH5\_1\_307 LY-----QLE-RRTLKAPLRGTLTLLCTYVIHIFARSVEVGFMS  
UniRef90\_UPI00020369CA\_1\_441 LR-----QLD-QRKLKAPLRGSLLCITYVIHIFTRSAVEVGFMS  
UniRef90\_R4GLX1\_1\_405 LR-----QLD-QRKLKAPLRGSLLCITYVIHIFTRSAVEVGFMS  
UniRef90\_UPI00035A19E6\_1\_466 LR-----QLD-QRKLKAPLRGSLLCITYVIHIFTRSAVEVGFMS  
UniRef90\_F6WA84\_1\_463 LR-----QLE-QRKLKAPLRGALLCTYVIHILTRSAVEIGFMS  
UniRef90\_G1SG18\_1\_430 LR-----RLEEQRKRIHKVPLKGCLLRITYVLHILTRSVLEVGFM  
UniRef90\_UPI00032B0E64\_1\_413 LR-----RLEEQRKRIHKVPLKGCLLRITYVLHILTRSVLEVGFM  
UniRef90\_UPI0002C65D9D\_1\_412 LR-----RLEEQRKRIHKVPLKGCLLRITYVLHILTRSVLEVGFM  
UniRef90\_F7CF28\_1\_383 LR-----RLEEQRKRIHKVPLKGCLLRITYVLHILTRSVLEVGFM  
UniRef90\_Q969M2\_1\_435 LR-----RLEEQRKRIHKVPLKGCLLRITYVLHILTRSVLEVGFM  
UniRef90\_L9JVZ3\_1\_406 LR-----RLEEQRKRIHKVPLKGCLLRITYVLHILTRSVLEVGFM  
UniRef90\_I3M407\_1\_414 LK-----RLEEQRKRIYKVPLKGCLLRITYVLHILTRSVLEVGFM  
UniRef90\_L5JMB7\_1\_435 LS-----GLEEQRKRIHKVPLKGCLLRITYVLHILTRSVLEVGFM  
UniRef90\_L8J083\_1\_417 LR-----KLEEQRKRIQKVPLKGCLLRITYVLHILTRSVLEVGFM  
UniRef90\_UPI0002BCCF6\_1\_421 LR-----KLEEQRKRIQKVPLKGCLLRITYVLHILTRSVLEVGFM  
UniRef90\_F1RY20\_1\_421 LR-----KLEEQRKRIQKVPLKGCLLRITYVLHILTRSVLEVGFM  
UniRef90\_UPI0002C59166\_1\_412 LK-----RLEEQRKRIHKVPLKGCLLRITYILHILTRSMLEIGFMS  
UniRef90\_G3TBX7\_1\_436 LR-----MLEEQRKRIYKVPLKGCLLRITYILHILTRSMLEIGFMS  
UniRef90\_G3GSS7\_1\_405 LR-----RLEEQRKRIHKVPLKGCLLRITYILHILTRSMLEVGFM











UniRef90\_F7B1T8\_1\_432 SRP-----AAALGFPPYYAHT-APAGQARALGY  
UniRef90\_L9L2D3\_1\_460 SGPP-----TVTIGFPPYYTHSASNLGQVRAPGY  
UniRef90\_Q64448\_1\_417 SGPP-----SVSIGFPPYYTHPACPTVQAKAIGF  
UniRef90\_G3H8J5\_1\_417 SGLP-----SASMGFPPFYTHPACPPVQARATGF  
UniRef90\_UPI0003333DA4\_1\_405 PGPP-----SVSTGFLPYCTHPGCSPGQSRAATKY  
UniRef90\_I3NC37\_1\_417 --PP-----TVTIGFPPPLYTHYASPLGQAGEAGY  
UniRef90\_H0XD37\_1\_430 SGPA-----AVTIGFPPYYTQAPSSLGQARPAGY  
UniRef90\_G1U3S9\_1\_407 PGPP-----SVAIGFPPSYAH-AAALPQ--ER GK  
UniRef90\_UPI00032AEFC1\_1\_413 PGPP-----AVTIGFPPSYAHAAAAALPQGPARAS  
UniRef90\_UPI00034F30A8\_1\_402 PGPA-----TVAIGFPPYYAHSASAPGQAAPKGY  
UniRef90\_UPI0003340A67\_1\_370 -----AVPLGVSPCCVHTS-----QGH  
UniRef90\_UPI0002234D0E\_1\_449 SVPP-----TISIGFPPYYTHSASSLGQTMATGY  
UniRef90\_G3TTN5\_1\_429 SVPP-----TISIGFPPYYTHSASSLGQTMATGY  
UniRef90\_UPI0002C457ED\_1\_447 SAPP-----TIPIGFP--YYTHSASSPGQTMATGY  
UniRef90\_UPI000333D50E\_1\_427 STPT-----PAPLGFPPYYTHSASSLGQTVAATGY  
UniRef90\_UPI0003343FBC\_1\_423 SALP-----AVTVGFPPCSTHSASSLAQT---AY  
UniRef90\_F7G5V2\_1\_446 SAPP-----AVGFPPYYTQSASSLGQATTGTY  
UniRef90\_G3VY19\_1\_428 SAPP-----TVGFPPYYTQSASSLGQATTAGY  
UniRef90\_UPI000155BBAC\_1\_459 APPPP-----TVTIGFPPFYQSASSSLRQATPSGY  
UniRef90\_F7EY8\_1\_425 APPPP-----TVTIGFPPFYQSASSSLRQATPSG-  
UniRef90\_I3KXW1\_1\_474 PSSPSYP-----PNYTD-----VTAGSGAFLPPMGFAA  
UniRef90\_UPI00022B3AE8\_1\_449 PSSPSYP-----PNYTD-----VTAGSGAFLPPMGFAA  
UniRef90\_UPI0002A48057\_1\_447 PSSLSYP-----PNYTD-----VTAGSGAFLPPMDFAA  
UniRef90\_H2MCD5\_1\_421 PSSLSYP-----PNYTD-----VTAGSGAFLPPMDFAA  
UniRef90\_H2UTF3\_1\_420 PSS--YP-----PNYTD-----VTAGSGAFLQPVAPPA  
UniRef90\_UPI000298F1F6\_1\_460 PSS--YP-----PNYTD-----VTAGSGAFLQPVAPPA  
UniRef90\_H3DE08\_1\_376 AGR-----AFGRR-----VQDGR-----PPAEPAS  
UniRef90\_Q8JFD2\_1\_434 PPTLSYP-----PDYTE-----VAVAGGAFLQPVVS---  
UniRef90\_H2T4Y1\_1\_438 PSALECL-----STYSSMNMAGRVAEEGGTYSPPEASLA  
UniRef90\_H2T4Y2\_1\_428 PS-----ARRVAEEGGTYSPPEASLA  
UniRef90\_H3BZL0\_1\_378 -----SGGNEGRSYPPEASLA  
UniRef90\_I3K1N0\_1\_478 PLVLDCL-----PAFGSVSVMGDGAEEGGAYSPPEFPT  
UniRef90\_H2LFL5\_1\_470 PSALNRL-----P-----EYANGNANASFMGDRAAEE  
UniRef90\_M7BWJ7\_1\_486 PSPAAFP---TVSPALPDSHTITPLLSSQTVPPYYAEATARAQP-AATTF  
UniRef90\_K7F163\_1\_492 PSPAVLP---AVPPALSDSRAITPLLSSQTVPPYYAEATARAQP-ATAVS  
UniRef90\_H0ZM32\_1\_512 PAPPVVVTTATPPPVLDPDTRAVTPLLAPVTMASYYATGAPRRRPPNTTS  
UniRef90\_H3AH16\_1\_396 -----SLHYPPFYAEATSGGHHGYPGAP  
UniRef90\_B0BM18\_1\_388 -----YYTDVAAALPVLHHAARFS  
UniRef90\_Q4S8R0\_1\_345 PSYN-----YYTGHFAVPEFFPTDSKY  
UniRef90\_I3KYH7\_1\_341 PNYN-----YFGHSAVPEFFPTDSKY  
UniRef90\_H2M0G7\_1\_345 PNYT-----YLTSHTLSHEFFSADSKF  
UniRef90\_H3A471\_1\_360 QHYP-----FFPSHGRPQYPYNPSLAAY  
UniRef90\_Q6GLA5\_1\_353 PHPY-----HYSPTKE-GSTFSPTLAF  
UniRef90\_UPI0002A4A1D5\_1\_346 PSYDD-----YFSGHCQVQPAFPPIPSY  
UniRef90\_S4RXA6\_1\_456 HSVKTSS-----QPISYTYQPPTDERNYDPPSFRT  
UniRef90\_P16863\_1\_360 CSSPT-----APMSPPGYKLVGTGERN--PSSCRN  
UniRef90\_H2LU51\_1\_404 CVGTSVGR-----KTTIPTAPSG---YTLLEKQG  
UniRef90\_I3KYL3\_1\_401 CMGTTVGR-----KSTIPTAPSG---YTLLEKQG  
UniRef90\_G3NC44\_1\_402 CVGTSVGR-----KTTIPTAPCG---YTLLEKQG  
UniRef90\_H2SSL2\_1\_392 CAGTSVAG-----KTTIPTAPCG---YTLLEKQG  
UniRef90\_UPI0002C46B7E\_1\_433 ---TSANS-----LKQLPSASD----YHLLVEKKT  
UniRef90\_G3ULF1\_1\_432 ---VSANS-----LKGLPSAPD----YNLLVEKKT  
UniRef90\_C9IYK1\_1\_407 ---TSANS-----LKRLPSAPD----YNLLVEKQT  
UniRef90\_H0Y0G7\_1\_436 ---TAANS-----LKRFPSAPN----YNLLVEKQT  
UniRef90\_L9JD22\_1\_408 ---TSANS-----LKRLPSAPD----YNLLVEKQT  
UniRef90\_F1N617\_1\_436 ---TSANS-----LKRLSSVPD----YSLLDVKQT  
UniRef90\_F1SV25\_1\_385 ---TSANS-----LKRLSSAPD----YSLLDVEKQT  
UniRef90\_L5JUH5\_1\_307 ---TSANS-----LKQLSSAPD----YNLLVEKQT  
UniRef90\_UPI00020369CA\_1\_441 SLGISATP-----QKTLPSVLSG---YAFLMEKQT  
UniRef90\_R4GLX1\_1\_405 SLGISATP-----QKTLPSVLSG---YAFLMEKQT  
UniRef90\_UPI00035A19E6\_1\_466 SLEIPTTP-----QKTLPCALSS---HTFLMEKQT  
UniRef90\_F6WA84\_1\_463 CLGTATNP-----PKTLPSAPIG---YTVLREKQM  
UniRef90\_G1SG18\_1\_430 MICSSLPD-----RISLLQANN----QQQGIRINV  
UniRef90\_UPI00032B0E64\_1\_413 MICSSLPE-----RISLFQANN----QKQGIQVNV  
UniRef90\_UPI0002C65D9D\_1\_412 MICSPLE-----KISLLQANN----QQQVIQVNV  
UniRef90\_F7CF28\_1\_383 MICSSLPE-----KISLLQANN----QQQVIQVNV  
UniRef90\_Q969M2\_1\_435 MICSSLPE-----RISPLQANN----QQQVIRVNV  
UniRef90\_L9JVZ3\_1\_406 MICSSLPE-----RMSLLQANN----QQQVIQVNV  
UniRef90\_I3M407\_1\_414 TICSSLPE-----RISPLQANN----QQQVIQVNV  
UniRef90\_L5JMB7\_1\_435 MICSPLE-----RTPVLQANS----QQQIILVNV  
UniRef90\_L8J083\_1\_417 MTCSPFPE-----KISLLQANN----QQQVIRVNV  
UniRef90\_UPI0002BCCFF6\_1\_421 MNCSPFPE-----GVSLQASN----QQQVFRVNV  
UniRef90\_F1RY20\_1\_421 MISPFPE-----RISLLQANN----QQQVIQVNV  
UniRef90\_UPI0002C59166\_1\_412 MICSPLE-----RISLLQANN----QQQVIQVNV  
UniRef90\_G3TBX7\_1\_436 MICSSLPK-----RIPLLQANN----QQQVIRVNV  
UniRef90\_G3GSS7\_1\_405 MICSSLPD-----RPSLLQANN----RQKIRVNM  
MACSSLPE-----KFSLLQANN----KQQVIRVNI

UniRef90\_UPI0003316158\_1\_413  
UniRef90\_G3WUN4\_1\_443  
UniRef90\_F6W379\_1\_264  
UniRef90\_M7BL54\_1\_431  
UniRef90\_UPI0002B44362\_1\_276  
UniRef90\_UPI000298933C\_1\_429  
UniRef90\_H3CDZ2\_1\_426  
UniRef90\_I3IZH7\_1\_440  
UniRef90\_E7F3P4\_1\_389

MICSSLHE-----RSSLLQANN-----QQHPVQASA  
VTHSLLHE-----NIALLLQPVPQPIWPEQQQVIGIDN  
-----  
CIMSNSSP-----QSSYKLLPN-----QQGGLPVYL  
-----  
VLTNSSPQ-----RLVQLTQMTCSALPDTHGETLAI  
LLASSSPQ-----RLVQLTQVTCALPNTN-----AT  
VLSNSSPQ-----RLIQLTQMTCSAMPETQVESQPL  
FLTNSSPQ-----KQLHLTHTSLAMAPDGMVPLPI

UniRef90\_UPI0002C691BE\_1\_358  
UniRef90\_F7BKC0\_1\_358  
UniRef90\_Q0VCR2\_1\_359  
UniRef90\_G3TUX5\_1\_358  
UniRef90\_L9JKN2\_1\_358  
UniRef90\_P36382\_1\_358  
UniRef90\_UPI0003315E33\_1\_350  
UniRef90\_UPI000333FB64\_1\_358  
UniRef90\_UPI000334540D\_1\_357  
UniRef90\_L5K3R8\_1\_358  
UniRef90\_G1TQ37\_1\_358  
UniRef90\_UPI0001776F40\_1\_352  
UniRef90\_G3H2Q9\_1\_358  
UniRef90\_Q01231\_1\_358  
UniRef90\_G5BBL6\_1\_357  
UniRef90\_H0WCZ7\_1\_358  
UniRef90\_G3X1A3\_1\_358  
UniRef90\_H0ZTI1\_1\_370  
UniRef90\_P18860\_1\_369  
UniRef90\_G1KPB5\_1\_370  
UniRef90\_K7FWT6\_1\_369  
UniRef90\_F1QL21\_1\_400  
UniRef90\_UPI0002A497DC\_1\_408  
Input\_protein\_seq  
UniRef90\_UPI00027FC10C\_1\_397  
UniRef90\_L9JGQ0\_1\_441  
UniRef90\_P28236\_1\_440  
UniRef90\_G5BBL7\_1\_440  
UniRef90\_M3XED1\_1\_440  
UniRef90\_L5K685\_1\_440  
UniRef90\_F6VG96\_1\_441  
UniRef90\_P55917\_1\_440  
UniRef90\_UPI000329268E\_1\_442  
UniRef90\_G3UBH4\_1\_410  
UniRef90\_I3N7I6\_1\_431  
UniRef90\_G3X210\_1\_429  
UniRef90\_F7BIO6\_1\_372  
UniRef90\_UPI000333FA9E\_1\_424  
UniRef90\_K7EY71\_1\_406  
UniRef90\_M7BCA4\_1\_394  
UniRef90\_P36381\_1\_400  
UniRef90\_H2MUH4\_1\_428  
UniRef90\_UPI00022B4A0D\_1\_396  
UniRef90\_H3D8V1\_1\_361  
UniRef90\_G3NHJ7\_1\_420  
UniRef90\_Q503J6\_1\_391  
UniRef90\_F6QCF2\_1\_438  
UniRef90\_UPI00034FAB61\_1\_453  
UniRef90\_UPI0001DE8510\_1\_439  
UniRef90\_H3A837\_1\_370  
UniRef90\_G1KPB7\_1\_391  
UniRef90\_B0S6Z4\_1\_382  
UniRef90\_G1PZ72\_1\_426  
UniRef90\_UPI000155FB82\_1\_448  
UniRef90\_F6U7L2\_1\_428  
UniRef90\_UPI0002C6341D\_1\_440  
UniRef90\_M3Z8M0\_1\_445  
UniRef90\_G1Q1M8\_1\_411  
UniRef90\_G1PYG2\_1\_394  
UniRef90\_L5L5Q1\_1\_430  
UniRef90\_UPI0002BCF55A\_1\_410  
UniRef90\_P41987\_1\_407  
UniRef90\_J9JHI9\_1\_433  
UniRef90\_Q9Y6H8\_1\_435  
UniRef90\_G3QHB2\_1\_399

PFSNK-----MASQQNTDNLAT-----  
PFSNK-----MASQQNIDNLAT-----  
PFSNK-----MASQQNTDNLST-----  
PFSNK-----MASQQNTDNLAT-----  
PFSNN-----TASQQNTDNLAT-----  
PFSNN-----MASQQNTDNLVT-----  
PFSNK-----MASQQNTDNLAT-----  
PFSNK-----LASQQNTDNLAT-----  
PFSNK-----MASQQNTHNLAT-----  
PFSNQ-----VASQQNTDNLAT-----  
TFSTN-----TASQQNTDNLAT-----  
RFSNN-----MASQQNTDNLAT-----  
DFSNN-----MGSRKNPDTLAT-----  
DFSNN-----MGSRKNPDALAT-----  
PLKNN-----MASQQNTDNMAT-----  
PFSNN-----TVSQNTDNLAT-----  
HFSNN-----LASRQNTDNLAT-----  
PFSNK-----MASQQNTANFAT-----  
PFSNK-----MASQQNTANFAT-----  
PFSNK-----MASQQNTANFAT-----  
LHSHH-----LHHIHQTCQPFT--NH-----  
FPSHL-----LVHQNSSENTVTEKNK-----  
VETSP-----LPAKPFNQFEEKI-----  
VETTP-----VSAKPFNQFEEKI-----  
VETSP-----LSAKPFSQFAEKM-----  
VETSP-----LSAKPFSQFEEKI-----  
VQTSP-----LSAKPFSQFEEKT-----  
VETSP-----LSAKPFAQFEEKM-----  
VETSP-----LSAKPFGQFEEKM-----  
VETSP-----LSAKPFSQFEEKM-----  
VEASP-----LSAKPFSQFEEKV-----  
VETTP-----LSAKPFHQFEEKI-----  
VETSP-----LSAKPFSQFEEKI-----  
VETSP-----LAAQPFQGFEEKV-----  
VETRP-----LAATPFSRFEEKI-----  
VETRP-----LAATPFSRFEEKI-----  
VESSP-----LADKPFQFEEKM-----  
VETAP-----PPS-SFNLDLDEKL-----  
VEAGP-----PPS-SFKDLDEKL-----  
VEPSP-----LPS-AFNEFEEKI-----  
MEAGR-----GAS-PFHGLEEKG-----  
MEAGR-----GAP-PFQGLEEKV-----  
MEAGR-----GSP-PFQGLEEKV-----  
MEAGR-----GPP-PFLGLEEKA-----  
MEAGR-----LPA-SYEPFEEKSD-----  
LEASP-----LPA-HFNGYDK-----  
LEASP-----LPA-HFNGYDK-----  
LEASP-----LPA-HFNGYDK-----  
VETTP-----LPA-PFAGFEEKE-----  
AETTP-----VPP-SLNEFEEKM-----  
MEEGQ-----FFLPQLEKEQKSSQEAI-----  
GEASP-----RSAQPFRLEERR-----  
PGAPP-----PPTDFKMVALS-----EAHR  
PGAPP-----PPTDFKMVALS-----EAHR  
PGAPP-----PATDFKMVALS-----EAHG  
PGAPP-----PATDFDMAALS-----EAPG  
--APP-----PATDFNMAGLS-----QTQG  
--APP-----PATDFNMAALS-----QTQG  
PGAPL-----PATDVTKEALS-----EAQG  
PEPPP-----P-----AALP-----GTPG  
PEPPP-----P-----AALP-----GTPG  
PGAPP-----L-----AADF-----HPAA  
PGAPP-----PAADFKLLALT-----EARG  
PGAPP-----PAADFRMLALT-----EARG



|                              |                                              |
|------------------------------|----------------------------------------------|
| UniRef90_F7B1T8_1_432        | PGAPP-----PAADFKLALTL-----EARG               |
| UniRef90_L9L2D3_1_460        | PGAPPG-----PAADFKVGALT-----EAQG              |
| UniRef90_Q64448_1_417        | PGAPL-----SPADFTVVTLN-----DAQG               |
| UniRef90_G3H8J5_1_417        | PEAPP-----PPADFTVVTLN-----DAQD               |
| UniRef90_UPI0003333DA4_1_405 | PGTTP-----PAADFTVVSLK-----EAQG               |
| UniRef90_I3NC37_1_417        | PGAPP-----PAADFKMVALN-----ESQG               |
| UniRef90_H0XD37_1_430        | PGAPP-----PAADFKVVALS-----EVPE               |
| UniRef90_G1U3S9_1_407        | G-QAL-----PTTEQNWAPTP-----VA                 |
| UniRef90_UPI00032AEFC1_1_413 | P-PAG-----DSTEVALVAEPEKGRLL-----LPTS         |
| UniRef90_UPI00034F30A8_1_402 | PGAPL-----PTADFRVAQGG-----EAHG               |
| UniRef90_UPI0003340A67_1_370 | SGTPL-----PATDLGLEAPG-----EACV               |
| UniRef90_UPI0002234D0E_1_449 | PGAPP-----PPADFKMVPLS-----EEQG               |
| UniRef90_G3TTN5_1_429        | PGAPP-----PPADFKMVPLS-----EEQG               |
| UniRef90_UPI0002C457ED_1_447 | LGAPP-----PPTDFKMVALS-----EEQG               |
| UniRef90_UPI000333D50E_1_427 | PGAPP-----PPTDFKMVALA-----EERG               |
| UniRef90_UPI0003343FBC_1_423 | PGTTL-----PATNFKTVALA-----EVHG               |
| UniRef90_F7G5V2_1_446        | PGAPP-----QPTEFRMVTLPL-----EERS              |
| UniRef90_G3VY19_1_428        | PGAPP-----QPTEFRMVTLPL-----EERS              |
| UniRef90_UPI000155BBAC_1_459 | PGAPG-----PPTDFKVALG-----KERS                |
| UniRef90_F7EY8_1_425         | -----FKMAGLP-----KERS                        |
| UniRef90_I3KXW1_1_474        | VPSA-----AEFKMDDLQEQESLQSSP-----             |
| UniRef90_UPI00022B3AE8_1_449 | VPSA-----AEFKMDDLQEQESLQSSP-----             |
| UniRef90_UPI0002A48057_1_447 | LSSA-----EE--MEALHQEESI HQAPP-----           |
| UniRef90_H2MCD5_1_421        | LSSA-----EE--MEALHQEESI HQAPP-----           |
| UniRef90_H2UTF3_1_420        | VPST-----TEFKTDDLQREPPRHQPS-----             |
| UniRef90_UPI000298F1F6_1_460 | VPST-----TEFKTDDLQREPPRHQPS-----             |
| UniRef90_H3DE08_1_376        | PP-----                                      |
| UniRef90_Q8JFD2_1_434        | APST-----AEFKMDPLREEL-----                   |
| UniRef90_H2T4Y1_1_438        | VMSS-----PTGLKMD--GTVFHPDDFLLLEALPPSFCS----- |
| UniRef90_H2T4Y2_1_428        | VMSS-----PTGLKMD--GTVFHPDDFLLLEALPPSFCS----- |
| UniRef90_H3BZL0_1_378        | VMSS-----PASLKMD--GSAFHPDDLLEALPASFCG-----   |
| UniRef90_I3K1N0_1_478        | VTSLNAATTVPAGMKMD--STMFHPDDFLDAA--SFYS-----  |
| UniRef90_H2LFL5_1_470        | GASS-----PAVIFNPNMATTPTPELNLVRSPSFST-----    |
| UniRef90_M7BWJ7_1_486        | LADYP-----GAPPFSEEQHNATPTPTPTSIPTPTPTSIPT    |
| UniRef90_K7F163_1_492        | LAGYS-----GALPFAEELHKTATPIPASTPIPTPTLVPT     |
| UniRef90_H0ZM32_1_512        | MASYP-----AAPQVPEERHHAVTPTPISTPTPTPTPTPT     |
| UniRef90_H3AH16_1_396        | AADFK-----AMPPPAEPEPKPS-----                 |
| UniRef90_B0BM18_1_388        | APDFK-----ITSVPEEALESPS-----                 |
| UniRef90_Q4S8R0_1_345        | SVT-----EPGSAYSPPYS-----                     |
| UniRef90_I3KYH7_1_341        | GMP-----EPNSAYSPPYN-----                     |
| UniRef90_H2M0G7_1_345        | NVA-----EPNSAYNPYN-----                      |
| UniRef90_H3A471_1_360        | PLPSM-----NENNSSFHPYN-----                   |
| UniRef90_Q6GLA5_1_353        | PLSP-----SKTTSNVMS-----                      |
| UniRef90_UPI0002A4A1D5_1_346 | DLSPLS-----KSTDSSFHPYH-----                  |
| UniRef90_S4RXA6_1_456        | ATRDVLVAGGR-----LVAQGVGDQNWANWE-----EEE      |
| UniRef90_P16863_1_360        | YNKQASE-----QNWANYS-----AEQ                  |
| UniRef90_H2LU51_1_404        | NGPN-----YPLLSASSAFVPIQ-----                 |
| UniRef90_I3KYL3_1_401        | NGPN-----YPLLNASSAFVPIQ-----                 |
| UniRef90_G3NC44_1_402        | NGPA-----YPLLNASSAFVPIK-----                 |
| UniRef90_H2SSL2_1_392        | NGPN-----YSLLNASSAFIPIQ-----                 |
| UniRef90_UPI0002C46B7E_1_433 | HTTV-----YPSLNSSSALQVDP-----                 |
| UniRef90_G3ULF1_1_432        | HKTV-----YPSFNSSSALQVDP-----                 |
| UniRef90_C9IYK1_1_407        | HTAV-----YPSLNSSSVFQPNP-----                 |
| UniRef90_H0Y0G7_1_436        | HTAE-----YPSLNSSSVFQANL-----                 |
| UniRef90_L9JD22_1_408        | HPAV-----YPSLNSSSAFQADP-----                 |
| UniRef90_F1N617_1_436        | HTAG-----YPSLN-PSAFQTD-----                  |
| UniRef90_F1SV25_1_385        | HRAV-----YPSLN-SSVYQTD-----                  |
| UniRef90_L5JUH5_1_307        | HTAV-----YPSLN-LSAFQAD-----                  |
| UniRef90_UPI00020369CA_1_441 | DTAI-----YPVLNSAPMFQSIQ-----                 |
| UniRef90_R4GLX1_1_405        | DTAI-----YPVLNSAPVFQPVQ-----                 |
| UniRef90_UPI00035A19E6_1_466 | DTML-----YPVLNSPSVFQSVQ-----                 |
| UniRef90_F6WA84_1_463        | NPTV-----YPGFSSPSVLQALQ-----                 |
| UniRef90_G1SG18_1_430        | PKSK-----TMWQIQPRQPEA-----                   |
| UniRef90_UPI00032B0E64_1_413 | PKSK-----AMWQIQPRQSEE-----                   |
| UniRef90_UPI0002C65D9D_1_412 | PKSK-----TMWQIQPRQLEV-----                   |
| UniRef90_F7CF28_1_383        | PKSK-----TMWQIQPRQLEV-----                   |
| UniRef90_Q969M2_1_435        | PKSK-----TMWQIQPRQLEV-----                   |
| UniRef90_L9JVZ3_1_406        | PKSK-----SMWQIQPRRLGI-----                   |
| UniRef90_I3M407_1_414        | PKSK-----SIWQIQPPQLDV-----                   |
| UniRef90_L5JMB7_1_435        | PKSK-----TSWQIQPRQLEV-----                   |
| UniRef90_L8J083_1_417        | PNSK-----TWHIIPQARQLDV-----                  |
| UniRef90_UPI0002BCCFF6_1_421 | PNSK-----TTWQIQPRQLEV-----                   |
| UniRef90_F1RY20_1_421        | PKSK-----TTWQPPQPRQFEV-----                  |
| UniRef90_UPI0002C59166_1_412 | PKSK-----TMWQSSQPMQLGV-----                  |
| UniRef90_G3TBX7_1_436        | PKSE-----TIWQIQAKRLEV-----                   |
| UniRef90_G3GSS7_1_405        | PRSK-----SMWQIPHPRQHEV-----                  |

UniRef90\_UPI0003316158\_1\_413  
UniRef90\_G3WUN4\_1\_443  
UniRef90\_F6W379\_1\_264  
UniRef90\_M7BL54\_1\_431  
UniRef90\_UPI0002B44362\_1\_276  
UniRef90\_UPI000298933C\_1\_429  
UniRef90\_H3CDZ2\_1\_426  
UniRef90\_I3IZH7\_1\_440  
UniRef90\_E7F3P4\_1\_389

PKFN-----TMRQIPQPRQLEV-----  
TEHK-----PAWQPNQHNQSEG-----  
PPVQGYK-----VLQAPADHCQQAVGMGA-----  
P-----  
NVSHQ-----NQEGSGA-TNQHPSHIG-----  
SLSHQ-----NQEGSGN-ANQHPSHAC-----  
NLALV-----APQNLEG-HNISRPSQ-----  
YMQTAGHVVS-----NINPNGSVQPLRQDRLPSQ-----

UniRef90\_UPI0002C691BE\_1\_358  
UniRef90\_F7BKC0\_1\_358  
UniRef90\_Q0VCR2\_1\_359  
UniRef90\_G3TUX5\_1\_358  
UniRef90\_L9JKN2\_1\_358  
UniRef90\_P36382\_1\_358  
UniRef90\_UPI0003315E33\_1\_350  
UniRef90\_UPI000333FB64\_1\_358  
UniRef90\_UPI000334540D\_1\_357  
UniRef90\_L5K3R8\_1\_358  
UniRef90\_G1TQ37\_1\_358  
UniRef90\_UPI0001776F40\_1\_352  
UniRef90\_G3H2Q9\_1\_358  
UniRef90\_Q01231\_1\_358  
UniRef90\_G5BBL6\_1\_357  
UniRef90\_H0WCZ7\_1\_358  
UniRef90\_G3X1A3\_1\_358  
UniRef90\_H0ZTI1\_1\_370  
UniRef90\_P18860\_1\_369  
UniRef90\_G1KPB5\_1\_370  
UniRef90\_K7FWT6\_1\_369  
UniRef90\_F1QL21\_1\_400  
UniRef90\_UPI0002A497DC\_1\_408  
Input\_protein\_seq  
UniRef90\_UPI00027FC10C\_1\_397  
UniRef90\_L9JGQ0\_1\_441  
UniRef90\_P28236\_1\_440  
UniRef90\_G5BBL7\_1\_440  
UniRef90\_M3XED1\_1\_440  
UniRef90\_L5K685\_1\_440  
UniRef90\_F6VG96\_1\_441  
UniRef90\_P55917\_1\_440  
UniRef90\_UPI000329268E\_1\_442  
UniRef90\_G3UBH4\_1\_410  
UniRef90\_I3N716\_1\_431  
UniRef90\_G3X210\_1\_429  
UniRef90\_F7BI06\_1\_372  
UniRef90\_UPI000333FA9E\_1\_424  
UniRef90\_K7EY71\_1\_406  
UniRef90\_M7BCA4\_1\_394  
UniRef90\_P36381\_1\_400  
UniRef90\_H2MUH4\_1\_428  
UniRef90\_UPI00022B4A0D\_1\_396  
UniRef90\_H3D8V1\_1\_361  
UniRef90\_G3NHJ7\_1\_420  
UniRef90\_Q503J6\_1\_391  
UniRef90\_F6QCF2\_1\_438  
UniRef90\_UPI00034FAB61\_1\_453  
UniRef90\_UPI0001DE8510\_1\_439  
UniRef90\_H3A837\_1\_370  
UniRef90\_G1KPB7\_1\_391  
UniRef90\_B0S6Z4\_1\_382  
UniRef90\_G1PZ72\_1\_426  
UniRef90\_UPI000155FB82\_1\_448  
UniRef90\_F6U7L2\_1\_428  
UniRef90\_UPI0002C6341D\_1\_440  
UniRef90\_M3Z8M0\_1\_445  
UniRef90\_G1Q1M8\_1\_411  
UniRef90\_G1PYG2\_1\_394  
UniRef90\_L5L5Q1\_1\_430  
UniRef90\_UPI0002BCF55A\_1\_410  
UniRef90\_P41987\_1\_407  
UniRef90\_J9JHI9\_1\_433  
UniRef90\_Q9Y6H8\_1\_435  
UniRef90\_G3QHB2\_1\_399

-----EQVQDQEIQPEG-FIHIRYAQ-----  
-----EQVRDQEIQPEG-FIHIRYAQ-----  
-----EQVRSQEIQREG-FIHIRYAQ-----  
-----EQVRGQEEIPPEG-FINIRYAQ-----  
-----EQVQGQEQIPMEG-FIHVRYGQ-----  
-----EQVRGQEQTPPEG-FIQVRYGQ-----  
-----EQVRGQDPLSRDG-FIHIHYDQ-----  
-----EQVRGHEEMPPEG-FTHLRYAQ-----  
-----EQVRGQEQAPGDG-FIHVRYAQ-----  
-----EQVRGQEQVPEG-FIHVHYSQ-----  
-----ERVRGREQVPEG-FIHIRYDQ-----  
-----EQVQQGE--PG-----HIHYDQ-----  
-----EMFPDQELISRDG-FIHMHYGQ-----  
-----GEVFNQEIQPEG-FIHMHSYQ-----  
-----EQVQGHERIPPEG-FIHIHYGE-----  
-----EQVRGQERIPGED-FIHIHYGE-----  
-----EQVQGREEAAGRA-FLHMQYAE-----  
-----ERVHGQEDAAGEGPFIKSSYVE-----  
-----ERVHSQEDAAGEGPFMKSSYME-----  
-----ERVQSQDDIIGEGPFIQVNYTQ-----  
-----ERVHSQEDAAGEGQFIQINYAQ-----  
LAHQQNSVNMMAERHHSHDGLPAVDLFQMHHYGSPEARVR-----  
IVAAVEEANFLQMSYSPPEWQSAQNGQIQDGVYLKSDSKCY-----  
-----STGPLGDLSRGYQETLPSYAQVGAQVEGE-----  
-----STGPLGDLSRGYEETLPSYAQVGVQVEGE-----  
-----STGPLADLSRGYQETLPSYAQVGAQVEEAE-----  
-----GTGPLADMSRSYQETLPSYAQVGVQVEVERE-----  
-----GTGPLADISRSYQETLPSYAQVGAQVEGE-----  
-----GPGPLGDLSRAYQETLPSYAQVGAQEGESG-----  
-----GTGPLGDLSRAYQETLPSYAQVGAQVEEAE-----  
-----GTGPLGDLSRAYQETLPSYAQVGAQVEGEG-----  
-----GPGPLGDLSRAYQETLPSYAQVGAQEGVEE-----  
-----GTGPLGDLSRAYQETLPSYAQVGAQVEGE-----  
-----GTGPLGDLSQVYQETLPSYAQVGAQTDDGQ-----  
-----GAGPLADLARGYPETLPSYAQVGAQEGAGE-----  
-----GTGPLGDLSRAYTETLPSYAQVGEQVEAER-----  
-----STGPLGDLSRAYTETLPSYAQVGEQVEAER-----  
-----TAAPLGDLQVCRAKLPSYAPVEVEDVEQP-----  
-----GMGPVEDLSRTFDERLPSYAQAKEQKE-----  
-----GMGPLEDLSRAFDERLPSYAQAEQKE-----  
-----GMGPLEDLSRAFDERLPSYAQAKEPEE-----  
-----EVLPMEDITKVYDETLPSYAQTATV-----  
-----EVLPMEDI SKVYDETLPSYAQTETG-----  
-----EVLPMEDI SKVYDETLPSYQTETG-----  
-----EVLPMGGISKA YDETLPSYAQTETG-----  
-----EAMAPKKDMSKMYDETLPSYAQTTVIGPSAS-----  
-----GSTGILLEDISKGYDETLPSYRQAEELD-----  
-----GSTGILLEDISKGYDETLPSYRQAEELD-----  
-----GSTGILLEDISKGYDETLPSYRQAEELD-----  
-----NATGPLEDISKVYDETLPSYQMTQE-----  
-----SMEHLEDIPSAFEEQLPSYVQRDEQEE-----  
-----LPTAPPVEETIICDETQPSFLQVTTETLP-----  
-----GAGLPGGLGGADPEALPSYAQVGAQVCELG-----  
NGHPANFCNGNH-HLLMTEQNWANQEAQQRSVRKASLPASTSASLTPPG  
NGHPANFCNGNH-HLLMTEQNWANQEAQQ-----  
KGHAAKFYNGNH-HLLMTEQNWANQEAQQSSARKASPPVSASASLTPPG  
KDHPAKFYNGNH-HLLMTEQNWANQEAQQTSARRASLPASGSASLTPG  
KGHPDKFYNSNH-HLLMTEQNWANQEPGQQILP-----  
KGHPDKFYNSNH-HLLMTEQNWANQEPGQQAAP-----  
KGHPDKFYDSSQ-HLLTAEQNWATQEAQQLSVRKATPPPLS-----PS  
KGHPVGSPPGGH-HLLATAPNWAGREAEQQTSAGKASPP-----  
--TPGG--GGNQ-GLRARAQNWANREAEPPQTSRKRASPP-----  
--LPEAR-ARDQ-HLLMTEQNWANQEAQHTSARKASG-----  
KGQSAKLYNGHH-HLLMTEQNWANQAAERQPPALKAYPAA-----  
KGQSAKLYNGHH-HLLMTEQNWANQAAERQPPALKAYAAA-----

UniRef90\_F7B1T8\_1\_432  
UniRef90\_L9L2D3\_1\_460  
UniRef90\_Q64448\_1\_417  
UniRef90\_G3H8J5\_1\_417  
UniRef90\_UPI0003333DA4\_1\_405  
UniRef90\_I3NC37\_1\_417  
UniRef90\_H0XD37\_1\_430  
UniRef90\_G1U3S9\_1\_407  
UniRef90\_UPI00032AEFC1\_1\_413  
UniRef90\_UPI00034F30A8\_1\_402  
UniRef90\_UPI0003340A67\_1\_370  
UniRef90\_UPI0002234D0E\_1\_449  
UniRef90\_G3TTN5\_1\_429  
UniRef90\_UPI0002C457ED\_1\_447  
UniRef90\_UPI000333D50E\_1\_427  
UniRef90\_UPI0003343FBC\_1\_423  
UniRef90\_F7G5V2\_1\_446  
UniRef90\_G3VY19\_1\_428  
UniRef90\_UPI000155BBAC\_1\_459  
UniRef90\_F7EY8\_1\_425  
UniRef90\_I3KXW1\_1\_474  
UniRef90\_UPI00022B3AE8\_1\_449  
UniRef90\_UPI0002A48057\_1\_447  
UniRef90\_H2MCD5\_1\_421  
UniRef90\_H2UTF3\_1\_420  
UniRef90\_UPI000298F1F6\_1\_460  
UniRef90\_H3DE08\_1\_376  
UniRef90\_Q8JFD2\_1\_434  
UniRef90\_H2T4Y1\_1\_438  
UniRef90\_H2T4Y2\_1\_428  
UniRef90\_H3BZL0\_1\_378  
UniRef90\_I3K1N0\_1\_478  
UniRef90\_H2LFL5\_1\_470  
UniRef90\_M7BWJ7\_1\_486  
UniRef90\_K7F163\_1\_492  
UniRef90\_H0ZM32\_1\_512  
UniRef90\_H3AH16\_1\_396  
UniRef90\_B0BM18\_1\_388  
UniRef90\_Q4S8R0\_1\_345  
UniRef90\_I3KYH7\_1\_341  
UniRef90\_H2M0G7\_1\_345  
UniRef90\_H3A471\_1\_360  
UniRef90\_Q6GLA5\_1\_353  
UniRef90\_UPI0002A4A1D5\_1\_346  
UniRef90\_S4RXA6\_1\_456  
UniRef90\_P16863\_1\_360  
UniRef90\_H2LU51\_1\_404  
UniRef90\_I3KYL3\_1\_401  
UniRef90\_G3NC44\_1\_402  
UniRef90\_H2SSL2\_1\_392  
UniRef90\_UPI0002C46B7E\_1\_433  
UniRef90\_G3ULF1\_1\_432  
UniRef90\_C9IYK1\_1\_407  
UniRef90\_H0Y0G7\_1\_436  
UniRef90\_L9JD22\_1\_408  
UniRef90\_F1N617\_1\_436  
UniRef90\_F1SV25\_1\_385  
UniRef90\_L5JUH5\_1\_307  
UniRef90\_UPI00020369CA\_1\_441  
UniRef90\_R4GLX1\_1\_405  
UniRef90\_UPI00035A19E6\_1\_466  
UniRef90\_F6WA84\_1\_463  
UniRef90\_G1SG18\_1\_430  
UniRef90\_UPI00032B0E64\_1\_413  
UniRef90\_UPI0002C65D9D\_1\_412  
UniRef90\_F7CF28\_1\_383  
UniRef90\_Q969M2\_1\_435  
UniRef90\_L9JVZ3\_1\_406  
UniRef90\_I3M407\_1\_414  
UniRef90\_L5JMB7\_1\_435  
UniRef90\_L8J083\_1\_417  
UniRef90\_UPI0002BCCFF6\_1\_421  
UniRef90\_F1RY20\_1\_421  
UniRef90\_UPI0002C59166\_1\_412  
UniRef90\_G3TBX7\_1\_436  
UniRef90\_G3GSS7\_1\_405

RCPSAQLYHGGH-HLPLTEQNWAGRAAEQQRHELRAYPAA-----  
QGHPTKLYNG-H-HLLMTEQNWANQAAEQQSPARKDSPAA-----  
RNHPVKHCN--G-HHLLTEQNWTRQVAEQQTTPASKPSSAA-----  
RGHPAKHCN--G-HHLLITEQNWASRMAEQQTPASKASSAT-----  
EGHPGKHN-----LLMTEQNWASPAEQQLGSKAFPA-----  
KGHPAKLYNN-Q-HLLMTEQNWANQAAEQHTPARKASSAA-----  
KGHPAKLYNGHH-HLLMTEQNWVNQAAEQQLAPVLPASLAS-----  
EGQP-----SSRKASPAASS-AAAPSPAG-SSASS-----  
EPNW-----ASPAAEQAPSRKAAPSPGGSSSASS-----  
EGHP-----LPMTAQNWASP--AWAPDAPIPPGRT-----  
QGHP-----LPVTAQTVWPPASAWVSTTPSPSGRA-----  
KGHPARYNSCH-HLLMTEQNWANQAAEQASGRKPYPPVSTPAAPSPLS  
KGHPARYNSCH-HLLMTEQNWANQAAEQASGRKPYPPV-----  
KGHPARYN-CH-HLLMTEQNWANQAAEQASGRKPCPLTPTPAAPCPLS  
KGHAARYCNRCH-HLLMTEQNWANQAAEQASGRKPCPVPTVPVAPFSPS  
KGHPAKVFGSR-CLLGTQEQSAKQEVKQASARSSSLV-----  
KAAPAKYYGGNHHHILMTEQNWANQAAEQTFERKSSPNTTPTPTTPS  
KAAPAKYYGGNHHHILMTEQNWANQAAEQTFERKSSPNTTPTPTTPS  
RAASAQAFSSNQ-HILTAEQNWANQAAEQTLERKSLTAPGAP---SSPI  
RAASAQAFSSNQ-HILTAEQNWANQAAEQTLERKSLTAPGAP---SSPI  
--SSHYYISNNNNHRLATQQNWANLATEQQTREMKAATSPSSSCSATSSDN  
--SSHYYISNNNNHRLATQQNWANLATEQQTREMKAATSPSSSCSATSSDN  
--SSHYYISNNNNHRLATQQNWANLATEQQTREMNGTSPSPASSSTSNK  
--SSHYYISNNNNHRLATQQNWANLATEQQTREMNGTSPSPASSSTSNK  
--ASHYYISNNNNHRLATQQNWANLATEQQTREMKAATSSSSSTNDEQR-  
--ASHYYISNNNNHRLATQQNWANLATEQQTREMKAATSSSSSTNDEQQQ  
---PHYYSISNNNNHRLAAQQNWANLATEQQTRSSSPGASANAGS-----  
---SPFYISNNNNHRLAAEQNWANLATEQQTREMNAATSPSSSSSCSSDN  
--SNDKV---SHGQLTEVEQNWNSMALELRLTLNGKNSYP-----  
--SNDKV---SHGQLTEVEQNWNSMALELRLTLNGKNSYP-----  
--SSDKV---SHGQLTEVEQNWNSMALELQNLNG-----  
--SGEKVGVGSGQGQLVAMEQNWNNMVLEVHNLNGKNSASASS-----  
--NGEKVIGSHGQLSEMEQNWNRNMALELHNPNGNSSSSSSSSYAEPLPS  
PMQAITPCFNGSSQVLAVEQNWANLAVEQQRKPASSSAASAPSSIGQQ  
PVQAITCYFNGSSQALAAEQNWANLAVEQQRKPAPAR-SATSSSPSSTRQQ  
PTPAVINYFNSSSRALTSEQDWNMAAEHQKGVSSS-SAGSSTPSSVRHP  
-----YFINSNNHRLTTDQNWANLAAEQQTQERKP-ASSSSTNSVGN-  
-----LMSHHEHLIAASEQNWNTNLAVEREEMRSRS-SGSSCSATTALD  
-----NKVVYKQNRDNMAVER-KGKPEDEVVMERKP-----  
-----SKVAYKQNRDNMAVER-KGKAEENDMKGRKI-----  
-----SKAVHKQNRDNLAVER-KSRAEGDDSEKTKS-----  
-----SKAAHKQNRDNLAVER-NGRSDSN-HSPKE-----  
-----SQAARKQNRDNQAVER-NGIHDLNVAESSS-----  
-----SKAAYKQNKDNLAVERNKSGQECEDLKEKKG-----  
RRRVAQATSGDARHARHAPQPVSRSLAMRTPPPHGAPPPP-----  
NR-MGQAGS---TISNTHAQPFDFSDHQN--TKKMAPGHE-----  
-----GDPGGKPDCHKDVKEGALSRMEQNSNSNNTSS-----  
-----GDPGGKPDQKEGKEGVPSPTEHNNNSNNTSS-----  
-----GDPVAKPDLHKDGKEGVPSPTEQNSNSNNTSS-----  
-----GDPGAKSDRRKDGKEGIPSPTEQNSNSNNTSS-----  
-----ENYSGNDEKICILDEQETVLSNEMHTINTICSQ-----  
-----DSYSGNDEKICILDEQETVLSNEMHTISTGSH-----  
-----DNHSVNDEKICILDEQETVLSNEISTLSTSCSH-----  
-----DNHNMK-KKYSLEDEQETLSNEIYTLSTFCSH-----  
-----DNHSVNNEKICIVDEQETVLSNEMCTLSTSCSP-----  
-----DNHIGNDDKILDEQETLLS-EMCTFSTACGH-----  
-----DSHRGNDERGISNEQETVLSNKMCTLSTACGH-----  
-----NNHTENRGNYYTHHNQENKLPKKKPATNALAGQ-----  
-----NNHTENRGNYYTHHHQENKLPKKRPATNAVAGQ-----  
-----NACTESSNYTHCNQGSKSPKKRPATNALDNQ-----  
-----ET---GKKSPASDERNKPSDETCLSIVEGY-----  
-----DSSFSKKEWAEKDQHSGLQHVHSPCPQDASTR-----  
-----DSSFSKKEWAEKDQHSGLQHVHSPCPHEARPR-----  
-----DPCS-KKDWAEEKDQHSGLQHVHSPCPWDDDAR-----  
-----DPCS-KKDWEKQDQHSGLQHVHSPCPWDDDAR-----  
-----DPSNGKDWSEKQDQHSGLQHVHSPCPWAGSAG-----  
-----DPSRSKDWSEKQDQHSGLQHTHCPSPWDGGR-----  
-----DSSCSKRDCTEKDQHNGLQHLIHSPCPDGKAR-----  
-----DPCS-SRDKDWTGDEQDQHSGLQHVHSPCPQHGCAK-----  
-----DPCYSKDWAEKNQHNGLQHVHSPCPWDDDAR-----  
-----DPCS-SKDWAKADQHRGLQHVHSPCPWDDGGR-----  
-----DPCF-SKDWAEKDQHSGLQHVHSPCPWEGGAR-----  
-----DSCCVKEWAEKDQHSGLQHVHSPCLWEAGTQ-----  
-----VPCYDKKDWAEKDQHSGLQHVHSPCTWNSVSR-----  
-----DVSCSKRDWAERVNTNSGQLHVHSPCPQDGNR-----

UniRef90\_UPI0003316158\_1\_413 -----DACCSEQEDSAEKDQHGGQLHVHEPGLWTHSAT-----  
UniRef90\_G3WUN4\_1\_443 -----AFPLGKKNWSRRDQHHRMLQFSSVCPQDLDC-----  
UniRef90\_F6W379\_1\_264 -----  
UniRef90\_M7BL54\_1\_431 -----EQRRCSTDRPRSEQHHGQVPRLLHKHPENPRER-----  
UniRef90\_UPI0002B44362\_1\_276 -----GPSEE-----  
UniRef90\_UPI000298933C\_1\_429 -----MPAQGLHQVPPVEQQCAVGTRKPSYSSESSE-----  
UniRef90\_H3CDZ2\_1\_426 -----VPIQGVQVAPAEQHRLSGLRKPCSSESSE-----  
UniRef90\_I3IZH7\_1\_440 -----AEIQGLHQLGAMERRYTLENRKPCSDDSDNG-----  
UniRef90\_E7F3P4\_1\_389 -----PEIQVLQLGIKERRSI PDNRLQSCSSEDS-G-----

UniRef90\_UPI0002C691BE\_1\_358 -----  
UniRef90\_F7BKC0\_1\_358 -----  
UniRef90\_Q0VCR2\_1\_359 -----  
UniRef90\_G3TUX5\_1\_358 -----  
UniRef90\_L9JKN2\_1\_358 -----  
UniRef90\_P36382\_1\_358 -----  
UniRef90\_UPI0003315E33\_1\_350 -----  
UniRef90\_UPI000333FB64\_1\_358 -----  
UniRef90\_UPI000334540D\_1\_357 -----  
UniRef90\_L5K3R8\_1\_358 -----  
UniRef90\_G1TQ37\_1\_358 -----  
UniRef90\_UPI0001776F40\_1\_352 -----  
UniRef90\_G3H2Q9\_1\_358 -----  
UniRef90\_Q01231\_1\_358 -----  
UniRef90\_G5BBL6\_1\_357 -----  
UniRef90\_H0WCZ7\_1\_358 -----  
UniRef90\_G3X1A3\_1\_358 -----  
UniRef90\_H0ZTI1\_1\_370 -----  
UniRef90\_P18860\_1\_369 -----  
UniRef90\_G1KPB5\_1\_370 -----  
UniRef90\_K7FWT6\_1\_369 -----  
UniRef90\_F1QL21\_1\_400 -----  
UniRef90\_UPI0002A497DC\_1\_408 -----  
Input\_protein\_seq -----  
UniRef90\_UPI00027FC10C\_1\_397 -----GPPAEEGAEPEVGEKKEEAERL-----  
UniRef90\_L9JGQ0\_1\_441 -----GPPAEEGAEPEVGEK-EEAERA-----  
UniRef90\_P28236\_1\_440 -----GPPVEEAAEPEVGEKRLAERL-----  
UniRef90\_G5BBL7\_1\_440 -----EPPIEEAVEPEVGEKKQEAEKV-----  
UniRef90\_M3XED1\_1\_440 -----QQPVEETTEPEVEEKKPEAEKV-----  
UniRef90\_L5K685\_1\_440 -----EQPVEEGAEPEVGDKRQEAERV-----  
UniRef90\_F6VG96\_1\_441 -----EPPAEEGAEAEVAEKRQEAERV-----  
UniRef90\_P55917\_1\_440 -----EEQPVEEAAEPEAGEKSQEAEKV-----  
UniRef90\_UPI000329268E\_1\_442 -----EQPIEAAAEPEVGDKSQEAERV-----  
UniRef90\_G3UBH4\_1\_410 -----EQHV EAGAEPELGEKQEAERV-----  
UniRef90\_I3N716\_1\_431 -----E-----  
UniRef90\_G3X210\_1\_429 -----EPPAEEGAEPEVGEKPREGERA-----  
UniRef90\_F7BI06\_1\_372 -----EEEEGEVPPPEEEKQPEAVTP-----  
UniRef90\_UPI000333FA9E\_1\_424 -----ADQGAESE-----ERAAQV-----  
UniRef90\_K7EY71\_1\_406 -----EKVEAGEEEQDQEEEEHQEP-----  
UniRef90\_M7BCA4\_1\_394 -----EKVEAGEEEQ-----EP-----  
UniRef90\_P36381\_1\_400 -----EKVKAEEEE--QEEEQQAP-----  
UniRef90\_H2MUH4\_1\_428 -----GVTLHEDVEVEEQVQPPEAE-----  
UniRef90\_UPI00022B4A0D\_1\_396 -----GVTLHEEEPEE-----  
UniRef90\_H3D8V1\_1\_361 -----GVTLPR-----  
UniRef90\_G3NHJ7\_1\_420 -----GVTLRQAEVQPAEAEER-----  
UniRef90\_Q503J6\_1\_391 -----SGILRRDEDE-----  
UniRef90\_F6QCF2\_1\_438 -----VKVQASDAFEQASSERAASVR-----  
UniRef90\_UPI00034FAB61\_1\_453 -----VKVQASDAFEQASSERAASVR-----  
UniRef90\_UPI0001DE8510\_1\_439 -----VKVQASDAFEQASSERAASVR-----  
UniRef90\_H3A837\_1\_370 -----EETPDPQAEPTETIAAADTR-----  
UniRef90\_G1KPB7\_1\_391 -----EKVEQPEQEVAEVQDEQ-----  
UniRef90\_B0S6Z4\_1\_382 -----  
UniRef90\_G1PZ72\_1\_426 -----EQPGEEGADPERVAERLDAE-----  
UniRef90\_UPI000155FB82\_1\_448 -----SPQQLPQLGGAGSKAPALLA-----  
UniRef90\_F6U7L2\_1\_428 -----SPQQLPQLGGAGSKAPALLA-----  
UniRef90\_UPI0002C6341D\_1\_440 -----SPQQLPQGGDRAGSKVPVLLA-----  
UniRef90\_M3Z8M0\_1\_445 -----STKELPQEGGVGSSAPGLLE-----  
UniRef90\_G1Q1M8\_1\_411 -----LQAPQEGREGSKESVSLE-----  
UniRef90\_G1PYG2\_1\_394 -----CKPLKR-----AEAALE-----  
UniRef90\_L5L5Q1\_1\_430 -----SSLTPPGSPQPPQEPVPPV-----  
UniRef90\_UPI0002BCF55A\_1\_410 -----LSAPAAPKPPAG-PQQPPPE-----  
UniRef90\_P41987\_1\_407 -----APTPFAAESPPGGGQQLPE-----  
UniRef90\_J9JHI9\_1\_433 -----AAAPSASPSFAGSTGQLPPD-----  
UniRef90\_Q9Y6H8\_1\_435 -----STPAAPSPVGSSSPPLAHEAEAGAA-----  
UniRef90\_G3QHB2\_1\_399 -----STPAAPSP-----

UniRef90\_F7B1T8\_1\_432 -----PTPAAPSPTGSSSQPPTHEAEAGAA-----  
UniRef90\_L9L2D3\_1\_460 -----SSPAAPSPTGSGTQPALQEGRAGATGAT---  
UniRef90\_Q64448\_1\_417 -----SSPDGRKGLI-----  
UniRef90\_G3H8J5\_1\_417 -----SSPEGRKGLT-----  
UniRef90\_UPI0003333DA4\_1\_405 -----FSLPGGEDTPG-----  
UniRef90\_I3NC37\_1\_417 -----SRGTAPQLLE-----  
UniRef90\_H0XD37\_1\_430 -----SSFQPLPPEEGGDGE-----  
UniRef90\_G1U3S9\_1\_407 -----QPPRPEAGPGGSAPLLLG-----  
UniRef90\_UPI00032AEFC1\_1\_413 -----LPPPPEAGPGGSAPLLLG-----  
UniRef90\_UPI00034F30A8\_1\_402 -----PQPLQEAGPG-----  
UniRef90\_UPI0003340A67\_1\_370 -----PQFVQEAGLR-----  
UniRef90\_UPI0002234D0E\_1\_449 -----STPQLPLEVRAGSQAPLLLV-----  
UniRef90\_G3TTN5\_1\_429 -----AGSQAPLLLV-----  
UniRef90\_UPI0002C457ED\_1\_447 -----STPQLPLEGMAGGQTPLLLV-----  
UniRef90\_UPI000333D50E\_1\_427 -----SSPQSLESRRARGVPLLLV-----  
UniRef90\_UPI0003343FBC\_1\_423 -----SIPAGLTPPGNTQQAPRE-----  
UniRef90\_F7G5V2\_1\_446 -----SVRQLLQERGDSSGGGSKVPLL-----  
UniRef90\_G3VY19\_1\_428 -----GGSKVPLL-----  
UniRef90\_UPI000155BBAC\_1\_459 -----STQQNPPVEVGGGEGSEAPLL-----  
UniRef90\_F7EY8\_1\_425 -----STQQNPPEV-----  
UniRef90\_I3KXW1\_1\_474 -----EQHQSVNGALLLPTSNTTNTNITNATANAASSGSS  
UniRef90\_UPI00022B3AE8\_1\_449 -----EQHQSVNGALLLPTSNTTS-----  
UniRef90\_UPI0002A48057\_1\_447 -----NKYQQHDAATSGGRPGSPSN-----  
UniRef90\_H2MCD5\_1\_421 -----NKYQQQ-----  
UniRef90\_H2UTF3\_1\_420 -----SSSPGSASN-----  
UniRef90\_UPI000298F1F6\_1\_460 PVDAELLPSASSNITNTTTTVTASGSSSPGSASN-----  
UniRef90\_H3DE08\_1\_376 -----  
UniRef90\_Q8JFD2\_1\_434 -----VRQSKDAAQLASTPSSAG-----  
UniRef90\_H2T4Y1\_1\_438 -----PTLPSPP-----  
UniRef90\_H2T4Y2\_1\_428 -----PTLPSPP-----  
UniRef90\_H3BZL0\_1\_378 -----ETMEEP-----  
UniRef90\_I3K1N0\_1\_478 -----SPQVEKTPTPEEQSAFPTLPRNTPLSSLMPKETAMKEE---  
UniRef90\_H2LFL5\_1\_470 SPTSASSFSPEDEAALQENQLSMFPTLPRNTP-----  
UniRef90\_M7BWJ7\_1\_486 -----SPKQEAAASEQPLPSPLLPP-----VA  
UniRef90\_K7F163\_1\_492 -----SPKQEAASELPLPLPLLPP-----VA  
UniRef90\_H0ZM32\_1\_512 -----LPEQEEPLEQLLPPPAVLP-----IA  
UniRef90\_H3AH16\_1\_396 -----EGAQEAPT-----  
UniRef90\_B0BM18\_1\_388 -----SLRNDGGCEMLT-----  
UniRef90\_Q4S8R0\_1\_345 -----  
UniRef90\_I3KYH7\_1\_341 -----  
UniRef90\_H2M0G7\_1\_345 -----  
UniRef90\_H3A471\_1\_360 -----  
UniRef90\_Q6GLA5\_1\_353 -----  
UniRef90\_UPI0002A4A1D5\_1\_346 -----  
UniRef90\_S4RXA6\_1\_456 -----ASPLLLLQPWAASSPAACPS-----  
UniRef90\_P16863\_1\_360 -----MQPLTIILDQRP-----  
UniRef90\_H2LU51\_1\_404 -----  
UniRef90\_I3KYL3\_1\_401 -----  
UniRef90\_G3NC44\_1\_402 -----  
UniRef90\_H2SSL2\_1\_392 -----  
UniRef90\_UPI0002C46B7E\_1\_433 -----  
UniRef90\_G3ULF1\_1\_432 -----  
UniRef90\_C9IYK1\_1\_407 -----  
UniRef90\_H0Y0G7\_1\_436 -----  
UniRef90\_L9JD22\_1\_408 -----  
UniRef90\_F1N617\_1\_436 -----  
UniRef90\_F1SV25\_1\_385 -----  
UniRef90\_L5JUH5\_1\_307 -----  
UniRef90\_UPI00020369CA\_1\_441 -----  
UniRef90\_R4GLX1\_1\_405 -----  
UniRef90\_UPI00035A19E6\_1\_466 -----  
UniRef90\_F6WA84\_1\_463 -----  
UniRef90\_G1SG18\_1\_430 -----  
UniRef90\_UPI00032B0E64\_1\_413 -----  
UniRef90\_UPI0002C65D9D\_1\_412 -----  
UniRef90\_F7CF28\_1\_383 -----  
UniRef90\_Q969M2\_1\_435 -----  
UniRef90\_L9JVZ3\_1\_406 -----  
UniRef90\_I3M407\_1\_414 -----  
UniRef90\_L5JMB7\_1\_435 -----  
UniRef90\_L8J083\_1\_417 -----  
UniRef90\_UPI0002BCCFF6\_1\_421 -----  
UniRef90\_F1RY20\_1\_421 -----  
UniRef90\_UPI0002C59166\_1\_412 -----  
UniRef90\_G3TBX7\_1\_436 -----  
UniRef90\_G3GSS7\_1\_405 -----

UniRef90\_UPI0003316158\_1\_413 -----  
UniRef90\_G3WUN4\_1\_443 -----  
UniRef90\_F6W379\_1\_264 -----  
UniRef90\_M7BL54\_1\_431 -----  
UniRef90\_UPI0002B44362\_1\_276 -----  
UniRef90\_UPI000298933C\_1\_429 -----  
UniRef90\_H3CDZ2\_1\_426 -----  
UniRef90\_I3IZH7\_1\_440 -----  
UniRef90\_E7F3P4\_1\_389 -----

UniRef90\_UPI0002C691BE\_1\_358 -----KPEEL--NEVSPGH  
UniRef90\_F7BKC0\_1\_358 -----KPEVP--NGVSPGH  
UniRef90\_Q0VCR2\_1\_359 -----KPEVP--NEGSPGP  
UniRef90\_G3TUX5\_1\_358 -----RPEVP--NGVSPGH  
UniRef90\_L9JKN2\_1\_358 -----KPEVP--NGASPGP  
UniRef90\_P36382\_1\_358 -----KPEVP--NGVSPGH  
UniRef90\_UPI0003315E33\_1\_350 -----KPEVP--NEVSPGH  
UniRef90\_UPI000333FB64\_1\_358 -----RPEVP--HEVPPGH  
UniRef90\_UPI000334540D\_1\_357 -----KPEVP--NGGAPDH  
UniRef90\_L5K3R8\_1\_358 -----KPEVP--SEVSSGH  
UniRef90\_G1TQ37\_1\_358 -----KPDVP--DGVSPGH  
UniRef90\_UPI0001776F40\_1\_352 -----KPEVP--TEVSPGH  
UniRef90\_G3H2Q9\_1\_358 -----KPEEH--NGASPGH  
UniRef90\_Q01231\_1\_358 -----KPEYA--SGASAGH  
UniRef90\_G5BBL6\_1\_357 -----KPDVP--HGVSSGH  
UniRef90\_H0WCZ7\_1\_358 -----KPDVP--SGVSSGH  
UniRef90\_G3X1A3\_1\_358 -----GPEMA--NGVPNAH  
UniRef90\_H0ZTI1\_1\_370 -----SPEVA--SECAAP-  
UniRef90\_P18860\_1\_369 -----SPEVA--SECAAP-  
UniRef90\_G1KPB5\_1\_370 -----NPEVR--NNSAPG-  
UniRef90\_K7FWT6\_1\_369 -----SPEAP--NDSAPH-  
UniRef90\_F1QL21\_1\_400 -----SEMTTP--STPSTPS  
UniRef90\_UPI0002A497DC\_1\_408 -----SPESRDNNCLQIQN  
Input\_protein\_seq  
UniRef90\_UPI00027FC10C\_1\_397 -----TTEEQEKVAVPEGEKVPETPGVDKEGEKEEPOSEKVKSKQGL  
UniRef90\_L9JGQ0\_1\_441 -----TTEGQEKVAVPEGEKAETPGVEKDGEKEELQS-EVAKQGL  
UniRef90\_P28236\_1\_440 -----ATEGQEVVPAEAGEKVPETAGVGQESEKDELLAEEKASKQGL  
UniRef90\_G5BBL7\_1\_440 -----APEGQETVAVPDRERVETPGVGKEDEKEELQAEKVKTKQGL  
UniRef90\_M3XED1\_1\_440 -----TLEVQEAITEPEGERVETPGVGKEGEKEELQIEKVKTKQGL  
UniRef90\_L5K685\_1\_440 -----STEGQETLAVLEGEKVPETPEVGKEGEKDELQAEKVKQGL  
UniRef90\_F6VG96\_1\_441 -----STEGQETNDELEGDRVETPGAGKEGEKEELPAEKASKQGL  
UniRef90\_P55917\_1\_440 -----STEGQETTAVLEGEKVPETPKVGKEAEKEELQAEKVKSKQEL  
UniRef90\_UPI000329268E\_1\_442 -----STEGQEMVVVPEGEKIEPPEGEKQKGEELQAEVMSKQRV  
UniRef90\_G3UBH4\_1\_410 -----AVLEGEKGETPKVGKESEKEELQAEQISKQGL  
UniRef90\_I3N716\_1\_431 -----TLEGQDAVAVPDGDKVETPAVGKEGDKDELQAEKMTKPGI  
UniRef90\_G3X210\_1\_429 -----EMQEATVEQEEKEKVGTP-ERKAGE-----KQEL  
UniRef90\_F7BI06\_1\_372 -----QEEEEKAGTPVEMKAGD-----KQEL  
UniRef90\_UPI000333FA9E\_1\_424 -----TTEGQE--AVLEGENAESFPASAQAEKEELPAEKASKPGP  
UniRef90\_K7EY71\_1\_406 -----EEELE-----VKKMAAEQELPGEELPAVP-----  
UniRef90\_M7BCA4\_1\_394 -----EEEQE-----VEKVVVEEQEPPGEELPSVP-----  
UniRef90\_P36381\_1\_400 -----QEEPG-----VKKAEEEVVSDEVEGSPAP-----  
UniRef90\_H2MUH4\_1\_428 -----AEKVEEMADEDEEEVEEAENGEDAAPAEAGLEAT-----  
UniRef90\_UPI00022B4A0D\_1\_396 -----GATPAEAGTEAA-----  
UniRef90\_H3D8V1\_1\_361 -----AAEAP-----  
UniRef90\_G3NHJ7\_1\_420 -----VEKG-----ADEDLEVEEAGNGEGVNPPEETRMVET-----  
UniRef90\_Q503J6\_1\_391 -----LAVEADMEAS-----  
UniRef90\_F6QCF2\_1\_438 -----SPSVRAPSDRAPSERALSERAPTRAASEHAGSEHTPSVRT  
UniRef90\_UPI00034FAB61\_1\_453 -----SPSVRAPSDRAPSERALSERAPTRAASEHAGSEHTPSVRT  
UniRef90\_UPI0001DE8510\_1\_439 -----SPSVG--LDQSPNE-----PTPLRALPEQGNPNHTFPDPE  
UniRef90\_H3A837\_1\_370 -----GAEG-----FKEKAGVKVGEKHE-----  
UniRef90\_G1KPB7\_1\_391 -----ELPTEEPPREGD-----  
UniRef90\_B0S6Z4\_1\_382 -----RVSTEGRETPAVEGEASQVGKEGEGELPAEKVAKQRL  
UniRef90\_G1PZ72\_1\_426 -----NGNG-----SPLGESKLEVT-PDE-EEAVVTAV  
UniRef90\_UPI000155FB82\_1\_448 -----NGNG-----SPLGESKLEVT-PDE-EEAVVTAV  
UniRef90\_F6U7L2\_1\_428 -----NGNG-----SPWGEKKLEVT-PDE-EERAVATVV  
UniRef90\_UPI0002C6341D\_1\_440 -----NGNG-----SSLGESKLEVT-PDDGEEQPVTAV  
UniRef90\_M3Z8M0\_1\_445 -----NGDS-----SLLGESRLEVT-PDE-QQQAVT-AV  
UniRef90\_G1Q1M8\_1\_411 -----NGDS-----SLLGESRLEVT-PDE-QQQAVT-AV  
UniRef90\_G1PYG2\_1\_394 -----NGNG-----HSLGESSLAVTPDQ-GVPAVTSVP  
UniRef90\_L5L5Q1\_1\_430 -----GGAG-----SSGDS-----D-GEGAVT-AV  
UniRef90\_UPI0002BCF55A\_1\_410 -----GAAG-----SSGDS-----D-GEGAVT-AV  
UniRef90\_P41987\_1\_407 -----DGTGGGEPGLLLTGSRSLLGDSKLAVTPDD-AEQPVTTPA  
UniRef90\_J9JHI9\_1\_433 -----PLLLDGSG-----SSLEGSALAGTPEEEEE-QAVTTAA  
UniRef90\_Q9Y6H8\_1\_435 -----LLDGS-----SSLEGSALAGTPEEEEE-QAVTTAA  
UniRef90\_G3QHB2\_1\_399 -----LLDGS-----SSLEGSALAGTPEEEEE-QAVTTAA

|                              |                       |                                |
|------------------------------|-----------------------|--------------------------------|
| UniRef90_F7B1T8_1_432        | -----HLLLDGSG-----    | SSLEGSALAGTPEEEEE-QAVTTAA      |
| UniRef90_L9L2D3_1_460        | ----APLLLVDSG-----    | SSLEDSALAVTPEEEEE-QAVTTAA      |
| UniRef90_Q64448_1_417        | -----DSSG-----        | SSLQESALVVTPEEGE-QALATTV       |
| UniRef90_G3H8J5_1_417        | -----DSSG-----        | SSLEESALVVTPEEGE-QALATTV       |
| UniRef90_UPI0003333DA4_1_405 | -----DSSG-----        | SSLEESALAVTPEEEEEQALATTV       |
| UniRef90_I3NC37_1_417        | -----DRSG-----        | SSLEESALAVTPEEEEE-QALTTTA      |
| UniRef90_H0XD37_1_430        | -----VEGSG-----       | SSLEDSALAVTPEEEEEQAVTTAA       |
| UniRef90_G1U3S9_1_407        | -----DASG-----        | SGSEEVPLGATPEEEEE-PAVTTAA      |
| UniRef90_UPI00032AEFC1_1_413 | -----DASR-----        | SSSEEGPLGATPGEEEE-PAVTTAA      |
| UniRef90_UPI00034F30A8_1_402 | -----DSSG-----        | SSLEGRVVRVGTPEAE-----A         |
| UniRef90_UPI0003340A67_1_370 | -----DSSG-----        | SSLAGSARGGTPG-----             |
| UniRef90_UPI0002234D0E_1_449 | -----NGST-----        | SSLGENKLEVTPEE-KVQAETTRV       |
| UniRef90_G3TTN5_1_429        | -----NGST-----        | SSLGENKLEVTPEE-KVQAETTRV       |
| UniRef90_UPI0002C457ED_1_447 | -----NGST-----        | SNLEESKLEVTPEE-EVQAGATRV       |
| UniRef90_UPI000333D50E_1_427 | -----NGST-----        | SSLRGSKLEVCPEE-EVQAGATSV       |
| UniRef90_UPI0003343FBC_1_423 | -----GRAG-----        | NRVLLVNGNGRSSADTPDAGEPAATNI    |
| UniRef90_F7G5V2_1_446        | -----VINGSSS-----     | SLGATKSEVTSEG-EKQPGTTTV        |
| UniRef90_G3VY19_1_428        | -----LINGSSS-----     | SLGAAKSEVNSEG-EKQPGTTTV        |
| UniRef90_UPI000155BBAC_1_459 | -----LVNGSSS-----     | LGGGSGGEAEAG-EEWPGTTRV         |
| UniRef90_F7EY8_1_425         | -----NGGS-----        | LGGGSGGEAEAG-EEWPGTTRV         |
| UniRef90_I3KXW1_1_474        | PGNASNAGSWDGGKS-----  | EQDEGHV-----TTT-V              |
| UniRef90_UPI00022B3AE8_1_449 | -----SWDGGKS-----     | EQDEGHV-----TTT-V              |
| UniRef90_UPI0002A48057_1_447 | -----ADIWGSGRS-----   | MQEKGHI-----TTTTV              |
| UniRef90_H2MCD5_1_421        | -----SNIWGSGRS-----   | MQEKGHI-----TTTTV              |
| UniRef90_H2UTF3_1_420        | -----TGSWGGGRK-----   | ERGGENV-----STTRV              |
| UniRef90_UPI000298F1F6_1_460 | -----TGSWGGGRK-----   | ERGGENV-----STTRV              |
| UniRef90_H3DE08_1_376        | -----WGGGTN-----      | EQEGRRV-----STTRV              |
| UniRef90_Q8JFD2_1_434        | -----GGLST-----       | GPEEGHV-----TTT-V              |
| UniRef90_H2T4Y1_1_438        | -----NSSSSSLQ-----    | VPHDDVT-----VVTKA              |
| UniRef90_H2T4Y2_1_428        | -----NSSSSSLQ-----    | EETNPPL-----PQGEQ              |
| UniRef90_H3BZL0_1_378        | -----STASCD-----      | VPPDDVT-----VVTKA              |
| UniRef90_I3K1N0_1_478        | -----TTVITAPSK-----   | VLHNDFT-----VVTRA              |
| UniRef90_H2LFL5_1_470        | -----LSIIAPEVR-----   | AADEESP-----AVQNE              |
| UniRef90_M7BWJ7_1_486        | AVNSSSSTSLSRGSSS----- | KWDVEGEEATKEWPVSAACTTV         |
| UniRef90_K7F163_1_492        | AVSSSSSTSLSRGSSS----- | KWDVEGEEATKAWPLSVACTTV         |
| UniRef90_H0ZM32_1_512        | SANSGSSTSLSGASGS----- | KWDVEGAEELSGARPVSAACTTV        |
| UniRef90_H3AH16_1_396        | ----GSSGSLGGGK-----   | QGQEDGN-----VTTV               |
| UniRef90_B0BM18_1_388        | -----TEASGSS-----     | ARAEDRP-----VTRFV              |
| UniRef90_Q4S8R0_1_345        | -----                 | -----TCPAF                     |
| UniRef90_I3KYH7_1_341        | -----                 | -----SSPVL                     |
| UniRef90_H2M0G7_1_345        | -----                 | -----SSPAS                     |
| UniRef90_H3A471_1_360        | -----                 | -----GKAAP                     |
| UniRef90_Q6GLA5_1_353        | -----                 | -----ELDQF                     |
| UniRef90_UPI0002A4A1D5_1_346 | -----                 | -----AGSAP                     |
| UniRef90_S4RXA6_1_456        | -----                 | -----SSAAVAAALAAALEDEAEVLTATV  |
| UniRef90_P16863_1_360        | -----                 | -----                          |
| UniRef90_H2LU51_1_404        | -----                 | -----ETRSPAADKQGEAEARSPPHDDM   |
| UniRef90_I3KYL3_1_401        | -----                 | -----ETRSPPSDKQEEREDQSPPHEDL   |
| UniRef90_G3NC44_1_402        | -----                 | -----ETRSPPSDKQEEPEEQSSPPLERM  |
| UniRef90_H2SSL2_1_392        | -----                 | -----DTHSLPVDKHEEPEEP-----     |
| UniRef90_UPI0002C46B7E_1_433 | -----                 | -----IQHISSSNNEGTHKIFGKEVNDNQ  |
| UniRef90_G3ULF1_1_432        | -----                 | -----LQHINS-NNDGTHKISGKDVDNDQ  |
| UniRef90_C9IYK1_1_407        | -----                 | -----FQHISSNNKDKTHKIFGKELNGNQ  |
| UniRef90_H0Y0G7_1_436        | -----                 | -----LQPIGSNNKDKTHKIFGKEVNDNQ  |
| UniRef90_L9JD22_1_408        | -----                 | -----LGHIGSNNKDKTHKIFGKEVNDNQ  |
| UniRef90_F1N617_1_436        | -----                 | -----LQNISSSNKEDTHKLSGKEVNGNQ  |
| UniRef90_F1SV25_1_385        | -----                 | -----LQNVSSSNKEDTHKISGKEVNGNQ  |
| UniRef90_L5JUH5_1_307        | -----                 | -----                          |
| UniRef90_UPI00020369CA_1_441 | -----                 | -----TQNASTNCTEGLLARPGTEMRNSQ  |
| UniRef90_R4GLX1_1_405        | -----                 | -----TQNAGINCSEGLLGRPGTERRSSQ  |
| UniRef90_UPI00035A19E6_1_466 | -----                 | -----TQNASTNNNEGFLGQLWTEMHDAQ  |
| UniRef90_F6WA84_1_463        | -----                 | -----PANANLHSHSEGIISVVAEIGGTH  |
| UniRef90_G1SG18_1_430        | -----                 | -----IQHSGQQPDH-SSFVQNTTTIQSW  |
| UniRef90_UPI00032B0E64_1_413 | -----                 | -----IQHLGQQPNH-SSFALQNTASQSC  |
| UniRef90_UPI0002C65D9D_1_412 | -----                 | -----IQHLGQQPDH-SSFGLQNTLSQSC  |
| UniRef90_F7CF28_1_383        | -----                 | -----IQHLGQQPDH-SSFALQKTTQSC   |
| UniRef90_Q969M2_1_435        | -----                 | -----NQHLGQQSDH-SSFGLQNTMSQSW  |
| UniRef90_L9JVZ3_1_406        | -----                 | -----IQHRGQQQTH-SSFPHNTVPSQSW  |
| UniRef90_I3M407_1_414        | -----                 | -----IQHPGQQPCH-SSFGLRNTVPSQSW |
| UniRef90_L5JMB7_1_435        | -----                 | -----IQHSGQHPDL-SSFGLQNTMSQSW  |
| UniRef90_L8J083_1_417        | -----                 | -----IQHPGQQPDH-SLFLQNIIRPHSW  |
| UniRef90_UPI0002BCCFF6_1_421 | -----                 | -----IQHSAQQPDR-SPFGLQTTTPQSW  |
| UniRef90_F1RY20_1_421        | -----                 | -----IQHSGQQPDH-SSLGLQNPVPSQSW |
| UniRef90_UPI0002C59166_1_412 | -----                 | -----SQHPGQQPDL-SS-GLHNAKSHCC  |
| UniRef90_G3TBX7_1_436        | -----                 | -----MQDHGQQPDHPSSFFGQNTVPSQSW |
| UniRef90_G3GSS7_1_405        | -----                 | -----IQHPGQQPCH-SLFGSKNVMSQSW  |

UniRef90\_UPI0003316158\_1\_413 -----LQHPGQHSGK--PFGPQNAKCHSW  
UniRef90\_G3WUN4\_1\_443 -----VQYFQQCKHQYQQGHPQSSFSRGG  
UniRef90\_F6W379\_1\_264 -----  
UniRef90\_M7BL54\_1\_431 -----EQHYRQLSNQHGLGQPSRHPSSSSE  
UniRef90\_UPI0002B44362\_1\_276 -----D-----PSAYNSKKS-  
UniRef90\_UPI000298933C\_1\_429 -----PH--VRPQYAG-PRATLVASHMEI  
UniRef90\_H3CDZ2\_1\_426 -----PH--VKPQYAG-PRATLVASHMEI  
UniRef90\_I3IZH7\_1\_440 -----PHGSGKPHYAG-PRPTLTGGHMEI  
UniRef90\_E7F3P4\_1\_389 -----PKGSEPPKYSQQPRASFRASHIEI

UniRef90\_UPI0002C691BE\_1\_358 RLPARG-----YQSDKRCLSK-----ASSKARSDDLVS  
UniRef90\_F7BKC0\_1\_358 RLPHC-----YQNDKPRLSK-----ASSKARSDDLVS  
UniRef90\_Q0VCR2\_1\_359 SLPHG-----YQSDKRRLSK-----ASSKARSDDLVS  
UniRef90\_G3TUX5\_1\_358 RLPHG-----YHSDKRRLSK-----ASSKARSDDLVS  
UniRef90\_L9JKN2\_1\_358 RLPHG-----YHSDKRRLSK-----ASSRARSDDLVS  
UniRef90\_P36382\_1\_358 RLPHG-----YHSDKRRLSK-----ASSKARSDDLVS  
UniRef90\_UPI0003315E33\_1\_350 RLPQG-----YPSDKRRLSK-----ASSKARSDDLVS  
UniRef90\_UPI000333FB64\_1\_358 RLPQA-----YHGDKRRLSK-----ASSKARSDDLVS  
UniRef90\_UPI000334540D\_1\_357 RPPQG-----FGGDKRRLSK-----ASSKARSDDLVS  
UniRef90\_L5K3R8\_1\_358 RLPHS-----YQSDKRRLSK-----ASSKARSDDLVS  
UniRef90\_G1TQ37\_1\_358 PNPHG-----YQSDKRRLSK-----ASSKARSDDLVS  
UniRef90\_UPI0001776F40\_1\_352 HPTHG-----YHSDKRRLSK-----ASSKARSDDLVS  
UniRef90\_G3H2Q9\_1\_358 RLPFG-----YHGDKRRLSK-----ASSKARSDDLVS  
UniRef90\_Q01231\_1\_358 RLPQG-----YHSDKRRLSK-----ASSKARSDDLVS  
UniRef90\_G5BBL6\_1\_357 CLPHG-----CHSEKRRLSK-----TSSKARSDDLVS  
UniRef90\_H0WCZ7\_1\_358 RLPHG-----YYSEKRRLSK-----TSSRARSDDLVS  
UniRef90\_G3X1A3\_1\_358 RLPHS-----YHTDKRRLSK-----ASSKARSDDLVS  
UniRef90\_H0ZTI1\_1\_370 AFPEN-----YFNEKRRLSKAS---RASSKARSDDLVS  
UniRef90\_P18860\_1\_369 ALPES-----YFNEKRRLSKAS---RASSKARSDDLVS  
UniRef90\_G1KPB5\_1\_370 LLSNG-----YLPDKRRLSKTS---HASSKARSDDLVS  
UniRef90\_K7FWT6\_1\_369 QVSNG-----YFNEKRRLSKTS---HASSKARSDDLVS  
UniRef90\_F1QL21\_1\_400 SHPG-----FFRDKRRLSKTSG---TSSNRLRPSDLAV  
UniRef90\_UPI0002A497DC\_1\_408 CSPDGL-----LVKDKRRLSKASG---TSS--RTRADDLSV  
Input\_protein\_seq PAEKTPLSLCPPEL-----TTDDARPLSRLS---KASSRARSDDLTV  
UniRef90\_UPI00027FC10C\_1\_397 PAEKTPLSLCPPEL-----TTDDARPLSRLS---KASSRARSDDLTV  
UniRef90\_L9JGQ0\_1\_441 PAEKAPSLCPPEL-----TADDARPLSRLS---KASSRARSDDLTI  
UniRef90\_P28236\_1\_440 SAEKAPSLCPPEL-----TTDDNRPLSRLS---KASSRARSDDLTI  
UniRef90\_G5BBL7\_1\_440 SAEKAPSLCPPEL-----TADDTRPLSRLS---KASSRARSDDLTI  
UniRef90\_M3XED1\_1\_440 PVEKSPSLCPDP-----SRDDTRPLSRLS---KTSSRARSDDLTV  
UniRef90\_L5K685\_1\_440 PAEKAPSLCPPEL-----TGDDTRPLSRLS---KASSRARSDDLTV  
UniRef90\_F6VG96\_1\_441 PAEKAPSLCPPEL-----SGDDTRPLSRLS---KASSRARSDDLTI  
UniRef90\_P55917\_1\_440 TPEKAPSLCAEL-----PGEDTRPLSRLS---KASSRARSDDLTV  
UniRef90\_UPI000329268E\_1\_442 PAEKAPSLCAES-----TSDDTRPLSRVS---KTSSRARSDDLTV  
UniRef90\_G3UBH4\_1\_410 PAEKAPSLCAEV-----TTDETRPLSRLS---KASSRARSDDLTV  
UniRef90\_I3N7I6\_1\_431 SAEKAPSLCPPEL-----TAEARPLSRLS---KASSRARSDDLTI  
UniRef90\_G3X210\_1\_429 PVEKAP-LCPPEL-----AADDTRPLSRLS---KASSRARSDDLTV  
UniRef90\_F7BI06\_1\_372 PVEKIP-LCPPEL-----AADDTRPLSRLS---KASSRARSDDLTV  
UniRef90\_UPI000333FA9E\_1\_424 -----LLCAEL-----AADDPRALSRLS---KASSRARSDDLTV  
UniRef90\_K7EY71\_1\_406 -----AET--DTRPPSRLS---KTSSRARSDDLTV  
UniRef90\_M7BCA4\_1\_394 -----VELTADTRPPSRLS---KASSRARS-----  
UniRef90\_P36381\_1\_400 -----AELATDVRSLRSLRSL---KASSRARSDDLTV  
UniRef90\_H2MUH4\_1\_428 -----DTIDDSRPLSRLS---KASSRARSDDLTI  
UniRef90\_UPI00022B4A0D\_1\_396 -----ETIEDNRPLSRLS---KASSRARSDDLTV  
UniRef90\_H3D8V1\_1\_361 -----DTIEDTRPLSRLS---KASSRARS-----  
UniRef90\_G3NHJ7\_1\_420 -----DTIEDTRPLSRLS---KASSRARSDDLNV  
UniRef90\_Q503J6\_1\_391 -----ETIEDTRPLSSLS---KASSRARSDDLTV  
UniRef90\_F6QCF2\_1\_438 PSNSATPERVPSRAAS-----EHAPYSRSLRSLRSL---KASSRARSDDLTV  
UniRef90\_UPI00034FAB61\_1\_453 PSNSATPERVPSRAAS-----EHAPLDCAPSERAPSRAASEHAPS DRAPS  
UniRef90\_UPI0001DE8510\_1\_439 ALEPDIVEYEPLGPEMPLLNLEFIPDSRSLRSLRSL---KASSRARSDDLTV  
UniRef90\_H3A837\_1\_370 -----PLSRLS---KASSRARS-----  
UniRef90\_G1KPB7\_1\_391 -----MEDEQEPLGGNV---ALPSTADTRP---  
UniRef90\_B0S6Z4\_1\_382 -----EVDSLKTPTVLPEVLEEHSSEGESVEE--  
UniRef90\_G1PZ72\_1\_426 PAEKAPSPGAEL-----AGDDTRPLSRLS---KASSRARSDDLTV  
UniRef90\_UPI000155FB82\_1\_448 EMHAPPLPPTD-----PGRSSKASKSSG-----SRARPDDLAI  
UniRef90\_F6U7L2\_1\_428 EMHAPPLPPTD-----PGRSSKASKSSG-----SRARPDDLAI  
UniRef90\_UPI0002C6341D\_1\_440 AMHAPPLPPTD-----PGRSSKASKSSA-----GHARPDDLAV  
UniRef90\_M3Z8M0\_1\_445 EMHVPLL PAD-----PGRSSKASKSSG-----GRARPDDLAI  
UniRef90\_G1Q1M8\_1\_411 EMHMPLLPTD-----PRRSSKASKASN-----SQARPNDLAI  
UniRef90\_G1PYG2\_1\_394 EMHMPLLPTD-----PRRSSKASKASN-----SQARPNDLAI  
UniRef90\_L5L5Q1\_1\_430 DMHAPPLPAE-----PRRSSTASKASG-----GRARPSDLAI  
UniRef90\_UPI0002BCF55A\_1\_410 ELHAPPEL PAD-----PGRSSKASKSSG-----GRARASDLAI  
UniRef90\_P41987\_1\_407 ELHAPPEPPAD-----PGRSSKASKSSG-----GRARAGDLAI  
UniRef90\_J9JHI9\_1\_433 ETHAPPLPPED-----AGRLSKASRASG-----GRARPNDLPI  
UniRef90\_Q9Y6H8\_1\_435 QMHQPPLPLGD-----PGRASKASRASS-----GRARPEDLAI  
UniRef90\_G3QHB2\_1\_399 QMHQPPLLLGD-----PGRASKASRASS-----GRARPEDLAI



UniRef90\_F7B1T8\_1\_432  
UniRef90\_L9L2D3\_1\_460  
UniRef90\_Q64448\_1\_417  
UniRef90\_G3H8J5\_1\_417  
UniRef90\_UPI0003333DA4\_1\_405  
UniRef90\_I3NC37\_1\_417  
UniRef90\_H0XD37\_1\_430  
UniRef90\_G1U3S9\_1\_407  
UniRef90\_UPI00032AEFC1\_1\_413  
UniRef90\_UPI00034F30A8\_1\_402  
UniRef90\_UPI0003340A67\_1\_370  
UniRef90\_UPI0002234D0E\_1\_449  
UniRef90\_G3TTN5\_1\_429  
UniRef90\_UPI0002C457ED\_1\_447  
UniRef90\_UPI000333D50E\_1\_427  
UniRef90\_UPI0003343FBC\_1\_423  
UniRef90\_F7G5V2\_1\_446  
UniRef90\_G3VY19\_1\_428  
UniRef90\_UPI000155BBAC\_1\_459  
UniRef90\_F7EY8\_1\_425  
UniRef90\_I3KXW1\_1\_474  
UniRef90\_UPI00022B3AE8\_1\_449  
UniRef90\_UPI0002A48057\_1\_447  
UniRef90\_H2MCD5\_1\_421  
UniRef90\_H2UTF3\_1\_420  
UniRef90\_UPI000298F1F6\_1\_460  
UniRef90\_H3DE08\_1\_376  
UniRef90\_Q8JFD2\_1\_434  
UniRef90\_H2T4Y1\_1\_438  
UniRef90\_H2T4Y2\_1\_428  
UniRef90\_H3BZL0\_1\_378  
UniRef90\_I3K1N0\_1\_478  
UniRef90\_H2LFL5\_1\_470  
UniRef90\_M7BWJ7\_1\_486  
UniRef90\_K7F163\_1\_492  
UniRef90\_H0ZM32\_1\_512  
UniRef90\_H3AH16\_1\_396  
UniRef90\_B0BM18\_1\_388  
UniRef90\_Q4S8R0\_1\_345  
UniRef90\_I3KYH7\_1\_341  
UniRef90\_H2M0G7\_1\_345  
UniRef90\_H3A471\_1\_360  
UniRef90\_Q6GLA5\_1\_353  
UniRef90\_UPI0002A4A1D5\_1\_346  
UniRef90\_S4RXA6\_1\_456  
UniRef90\_P16863\_1\_360  
UniRef90\_H2LU51\_1\_404  
UniRef90\_I3KYL3\_1\_401  
UniRef90\_G3NC44\_1\_402  
UniRef90\_H2SSL2\_1\_392  
UniRef90\_UPI0002C46B7E\_1\_433  
UniRef90\_G3ULF1\_1\_432  
UniRef90\_C9IYK1\_1\_407  
UniRef90\_H0Y0G7\_1\_436  
UniRef90\_L9JD22\_1\_408  
UniRef90\_F1N617\_1\_436  
UniRef90\_F1S2V5\_1\_385  
UniRef90\_L5JUH5\_1\_307  
UniRef90\_UPI00020369CA\_1\_441  
UniRef90\_R4GLX1\_1\_405  
UniRef90\_UPI00035A19E6\_1\_466  
UniRef90\_F6WA84\_1\_463  
UniRef90\_G1SG18\_1\_430  
UniRef90\_UPI00032B0E64\_1\_413  
UniRef90\_UPI0002C65D9D\_1\_412  
UniRef90\_F7CF28\_1\_383  
UniRef90\_Q969M2\_1\_435  
UniRef90\_L9JVZ3\_1\_406  
UniRef90\_I3M407\_1\_414  
UniRef90\_L5JMB7\_1\_435  
UniRef90\_L8J083\_1\_417  
UniRef90\_UPI0002BCCFF6\_1\_421  
UniRef90\_F1RY20\_1\_421  
UniRef90\_UPI0002C59166\_1\_412  
UniRef90\_G3TBX7\_1\_436  
UniRef90\_G3GSS7\_1\_405

QMHQPPLLLGD-----PGRASKASRASG-----GRARPEDLAI  
ELHTPPLLLVE-----PGRASKASKASS-----GRARPGDLTI  
EMHSPLVLLD-----PGRSSKS---SN-----GRARPGDLAI  
EMHSPLVLLD-----PGRSSKA---SS-----GRARPGDLAI  
EMHNPPLLLLD-----PGRSSKA---SN-----RAKPGDLAI  
EMHEPPLLLTD-----PGRSSKA---SS-----GRARPGDLAI  
EMHVQPSEPADPADPADP---VDPGRSSKA---SS-----GRARPDDLAI  
EMHAPPLEAD-----AGRCSKAS--G-----GRARPSDLAI  
EMHAPPPLSAD-----AGRCSKAS--SS-----GRARPSDLAI  
QVEAPAPLLGD-----TGRSSKAS--S-----GRAKPRDLAI  
-VEAPALLPED-----PRRSSKAS--S-----GRAKPGDLAI  
DMHVPLLLGD-----VGRASKASKSSS-----GWARADDLAI  
DMHVPLLLGD-----VGRASKASKSSS-----GWARADDLAI  
DTHMPPLLLGD-----VGQASKASKLSS-----GRPRADDLAI  
DMHRPPLLLGD-----PGRASKTSRASSS-----GRLRADDLAI  
ELHRPPLLLRD-----AGQSGKAS--SN-----RARPNDLAI  
EMHAPPPLLVLD-----SRRLSKASKASS-----GRARSDDLAI  
EMHAPPPLLLID-----TRRLSKASKSSS-----GRARSDDLAV  
EIHESPLLLLD-----LRRLSKASKASS-----CRARSDDLAI  
EIHESPLLLLD-----LRRLSKASKASS-----CRARSDDLAI  
EMHEPPVMVSTD-----PRRLSRASKSSS-----IRARPSDLAV  
EMHEPPVMVSTD-----PRRLSRASKSSS-----IRARPSDLAV  
EMHEPPVTVRTD-----PRRLSRTSKSSS-----IRTRPSDLAV  
EMHEPPVTVRTD-----PRRLSRTSKSSS-----IRTRPSDLAV  
EMHEPPATAGVD-----PRRLSRASKSSS-----VRARPSDLAV  
EMHEPPATAGVD-----PRRLSRASKSSS-----VRARPSDLAV  
EMHDPPPAPGVD-----PRRLSRASKSSS-----VRARPSDLAV  
EMHEPP-VIFTD-----ARRLSRASKASS-----VRARPNDLAV  
EMHWPPASATT-----DIRKPSRASKCS-----VRARPDLLAV  
HSMFPTLPRHTPL-----YALTPPSRASKCS-----VRARPDLLAV  
EMHWPPASAAAT-----DIRKPSRASRSS-----VRARPDLLAV  
EMHQPPAAAGT-----DNRKPSRASKSGG-----GRARPDLLAV  
DATAEMHPPPA-----DTRRPSRACKYSG-----ARARPDLLAV  
EMHEPPLLLID-----  
EMHEPPLID-----  
EMHEPPLLVDT-----RLSRASKSSS-----CRARSDDLAV  
EMHEPPVPTDTR-----RL-----  
EMHQPP-----  
EGSADSQRRNS-----QSSKHS-----LQFPF-----  
EMSIENQRRNS-----QSSKHS-----  
EAPAESQRRNS-----QSSKHS-----  
SSPSDNQRSSS-----RSTKHGNKAKP-----ED-----  
EKQRLPSNRNR-----HSSNRSRPG-----  
GSP--TQPRPG-----YSTKRS-----  
QLHDPPLHSGGEH-----DIDLRLSRASS-----RVRSDDLQV  
-----  
ECGSSEYPTLPVADTSSCPALSGIVRKSRRVSP-----  
ERARSEYPTLPVSDASSSTVLSGITRKRTR-----  
GCTSSEYPTLPV--ASSCATMSGAAKRSRRVSP-----  
-LVTSEYPTLPVADATSCPTLSGITRKSRR-----  
VRRERRENDGKDSERNHYSRG-----VTVDLENHMRQSPPKVFSPLPANCN  
VKERENFGTDSERCHYSKG-----VSDLENHVSQSPQKVFSLPANCN  
LMEKRETEGKDSKRNYYSRGRHSIPGVAIDGENNMRQSPQT-----  
LREKTEIDGKDSKRN--SRGHCFIPGVAIDLGHIGQLPHTAFSMASTST  
LREKREMNAGKSKRNHYSRDHCSIPGVVIDLENHMQSPQTT-----  
LRGKRETDGKDSKRNHYFKGHCSSPGDAIELNHNHVGQSPQTAFLPANCN  
VRGKRESDESDESKRNHYPRG-----  
-----  
KEADQKHFLADTQNADTKTAR--NHLLEQLRSGRERRILHKFPHQEQQ--Q  
KEADQKHFLAGAQNADTAPRS--FAEMLSQPP-----LQFPF-----  
EEAEKHFLLVTONADTASTF--YLRSAEMPSQTSLQPGTTFPSTSRFRQ  
KQENTTTGHQANFEAAVHLGYR--PEMPLGAALYPSLQPEMTFSPPTDCT  
PGTTTTT---RHCPAYAVGTWKQSQDLEPLGEPLTDLHSDSSVRESGGWV  
P-DTTAS---RHCPVYAAGTQKQDLEPSGEPATDLHS--YCRDSDSSV  
LGTTTTAP---RHCPSTYIGTWEQPPQHPRSSGEPLTDFHS--HCRDSDGSV  
LGSTTAP---RHCPSTYIGTWEQPPQHPRSSGEPLTDFHS--HCRDSDGSV  
LGTTTTAP---RNCPSFAVGTWEQSDPEPSGEPLTDLHS--HCRDSEGS  
LGKMTAS---RHCPSTYIGTWEQSDPEPSGEPLTDLHS--HCRDSEGS  
LGATVAS---QHCPSTYIGTWEQSDPEPSGEPLTDMRS--HFKGSDGSV  
LGETTAP---RHCPSTYIGTWEQSDPEPSGEPLTDFHN--HCRDSEGS  
LGKMTAP---RHCPSTYIGTWEQSDPEPSGEPLTDLHS--HCRDSEGS  
LGTMMAS---RHCLSHHTGPWERPQDLKPSGEPLTDLHS--HCRDSEGS  
LGTEIAP---RHCPSTYIGTWEQSDPEPSGEPLTDLHS--HCRDSEGS  
LERTTAP---EHCPSTYIGTWEQSDPEPSGEPLTDLHS--HCKDSDGSV  
LGTMTAS---PHCPPSTLGTWERSHGQDASGKPLSDLQS--H-----





UniRef90\_UPI0003316158\_1\_413  
UniRef90\_G3WUN4\_1\_443  
UniRef90\_F6W379\_1\_264  
UniRef90\_M7BL54\_1\_431  
UniRef90\_UPI0002B44362\_1\_276  
UniRef90\_UPI000298933C\_1\_429  
UniRef90\_H3CDZ2\_1\_426  
UniRef90\_I3IZH7\_1\_440  
UniRef90\_E7F3P4\_1\_389

R-----  
TERGSYLGSKASFLSRASESSDSR-----  
-----  
RKHSR-----  
-----  
SSPSDSTD-----  
SNPSDSADS-----  
ASPSDSGDCQSGTDNAS-----  
-----
